# Supplementary material
Source: PubMed Central journal article supplement (PMC4353027)
Supplement: ja502310r_si_001.pdf [file ja502310r_si_001.pdf]

# ***Rational Design of Topographical Helix Mimics as Potent Inhibitors of Protein-Protein Interactions***

Brooke Bullock Lao,<sup>†,^</sup> Kevin Drew,<sup>‡,^</sup> Danielle A. Guarracino,<sup>†</sup> Thomas F. Brewer,<sup>†</sup> Daniel W. Heindel,<sup>†</sup>  
Richard Bonneau<sup>‡,\*</sup> and Paramjit S. Arora<sup>†,\*</sup>

<sup>†</sup>Department of Chemistry, and <sup>‡</sup>Departments of Biology and Computer Science, New York University, New York, New York 10003

<sup>^</sup>These authors contributed equally to this work. \*e-mail: arora@nyu.edu or bonneau@nyu.edu

## **Supporting Information**

### **Table of contents**

|                                         | page |
|-----------------------------------------|------|
| Supporting Schemes, Figures, and Tables | 2    |
| Synthesis of oxopiperazine dimers       | 13   |
| Protein Expression and Purification     | 14   |
| Protein Binding Assays                  | 18   |
| Compound Characterization               | 21   |
| Supporting References                   | 34   |

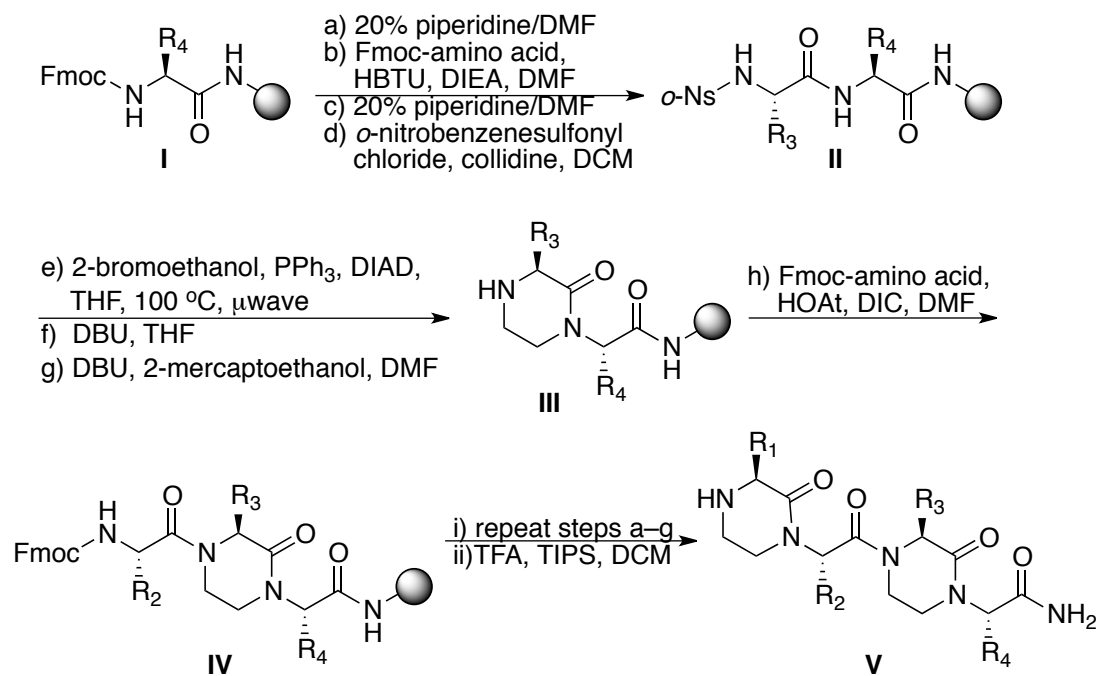

**Scheme S1.** Solid-phase synthesis of oxopiperazine dimers.

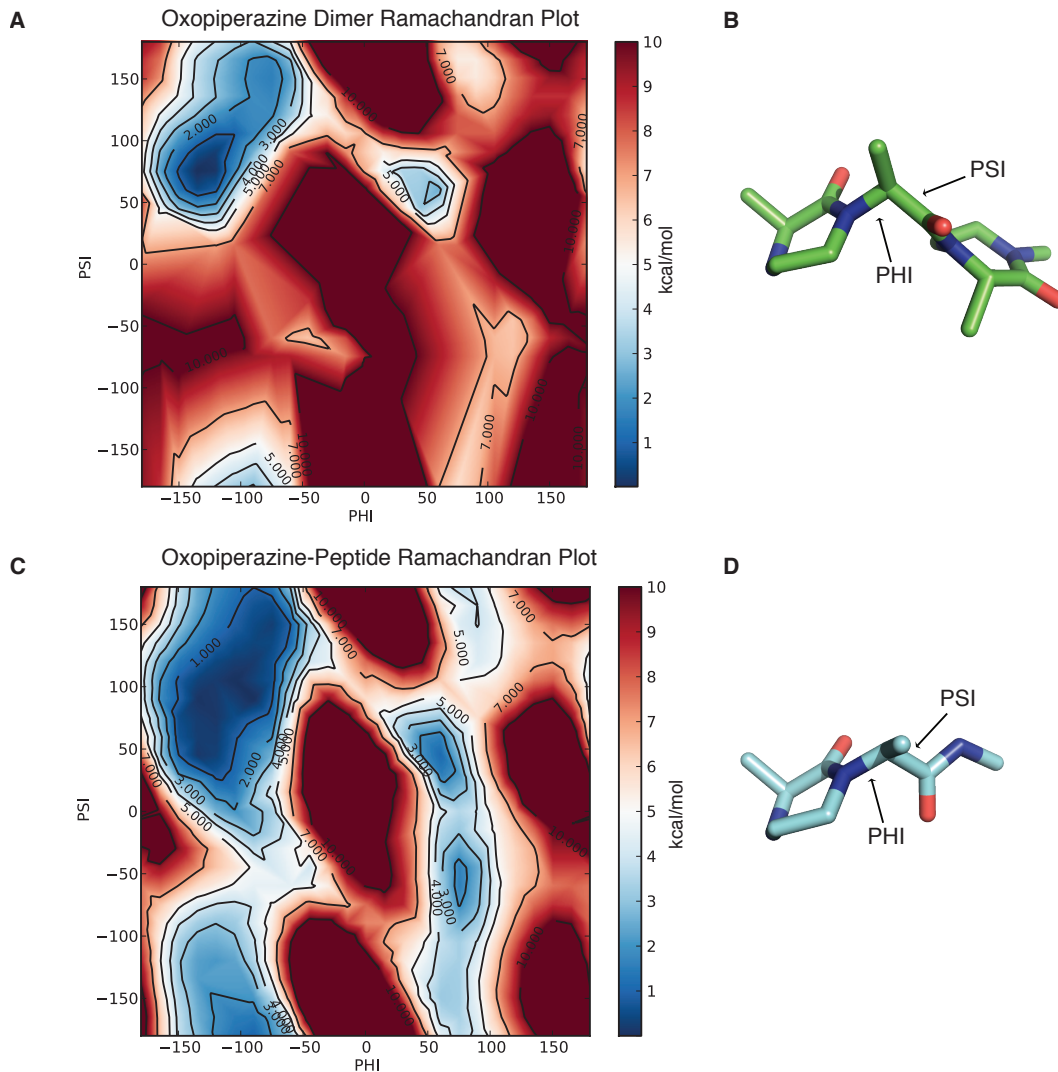

**Figure S1:** QM Ramachandran plots of oxopiperazine dimer and oxopiperazine-amino acid. A) Oxopiperazine dimer Ramachandran plot shows a constrained molecule with a single low energy well near  $\phi$  and  $\psi$  values of  $-135^\circ$  and  $75^\circ$ , respectively. B) Low energy conformation of oxopiperazine dimer model used in QM calculations. C) Oxopiperazine-amino acid Ramachandran plot shows a more flexible molecule than the oxopiperazine dimer with a very broad low energy well. D) Low energy conformation of oxopiperazine-amino acid model with  $\phi$  and  $\psi$  values of  $-75^\circ$  and  $150^\circ$ , respectively. The comparison between plots in A and C provides additional support for our hypothesis that the oxopiperazine dimer is a conformationally stable scaffold.

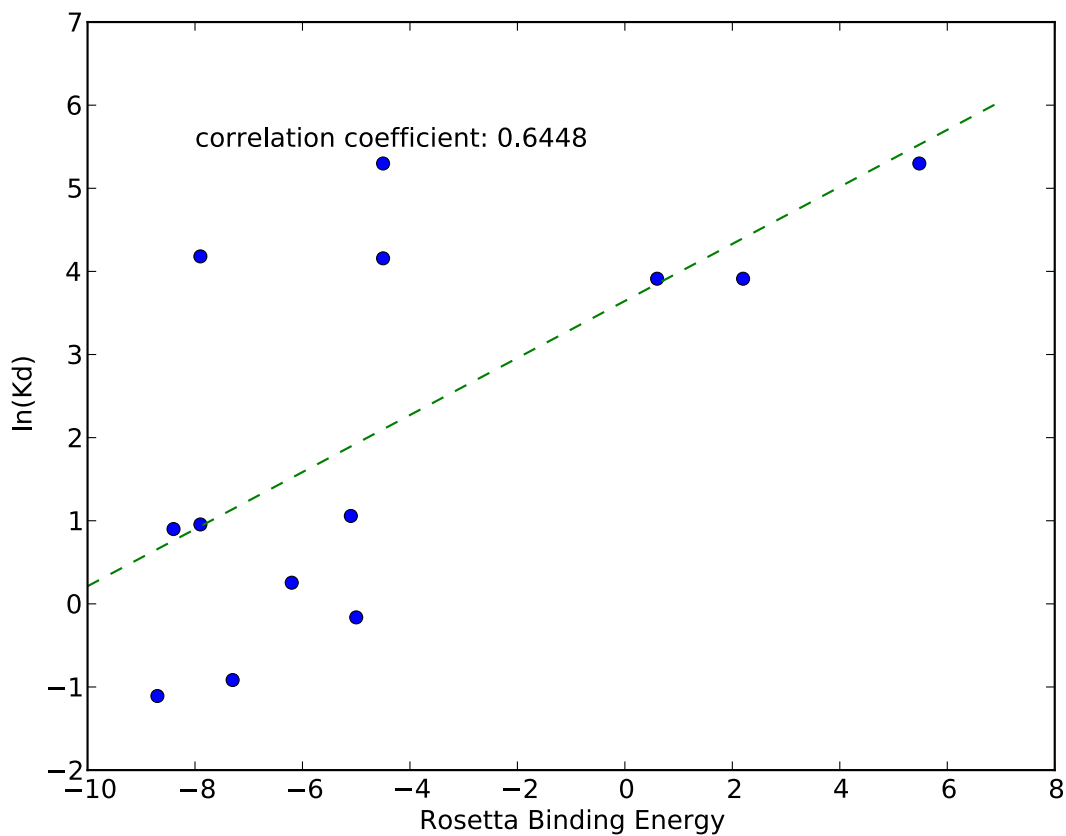

**Figure S2.** Correlation of Rosetta binding energy predictions with experimental  $K_d$  for Mdm2 ligands. Data points are taken from Table S2, and correlation coefficient was calculated using Python's `scipy.stats.stats.pearsonr` function. Rosetta binding energy (x axis) approximates free energy of binding which is proportional to  $\ln(K_d)$ . Explicitly:  $\Delta G = RT\ln(K_d)$  where  $R$  = ideal gas constant and  $T$  = temperature.

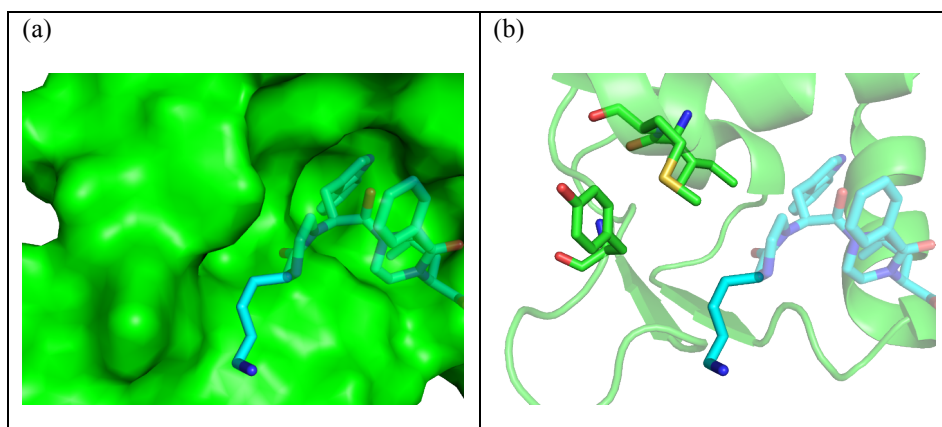

**Figure S3:** Predicted conformation of oxopiperazine 7 (KWFL) in complex with MDM2. Upon manual inspection of the KWFL design, the lysine in the 1<sup>st</sup> position of the oxopiperazine does not occupy the same pocket as the p53 Phe19. This suggests oxopiperazine 7 is a poor competitor with p53 and provides a clear explanation of the discrepancy between the predicted Rosetta binding energy and the experimental  $K_d$ . A) surface and B) ribbon representation.

(a)

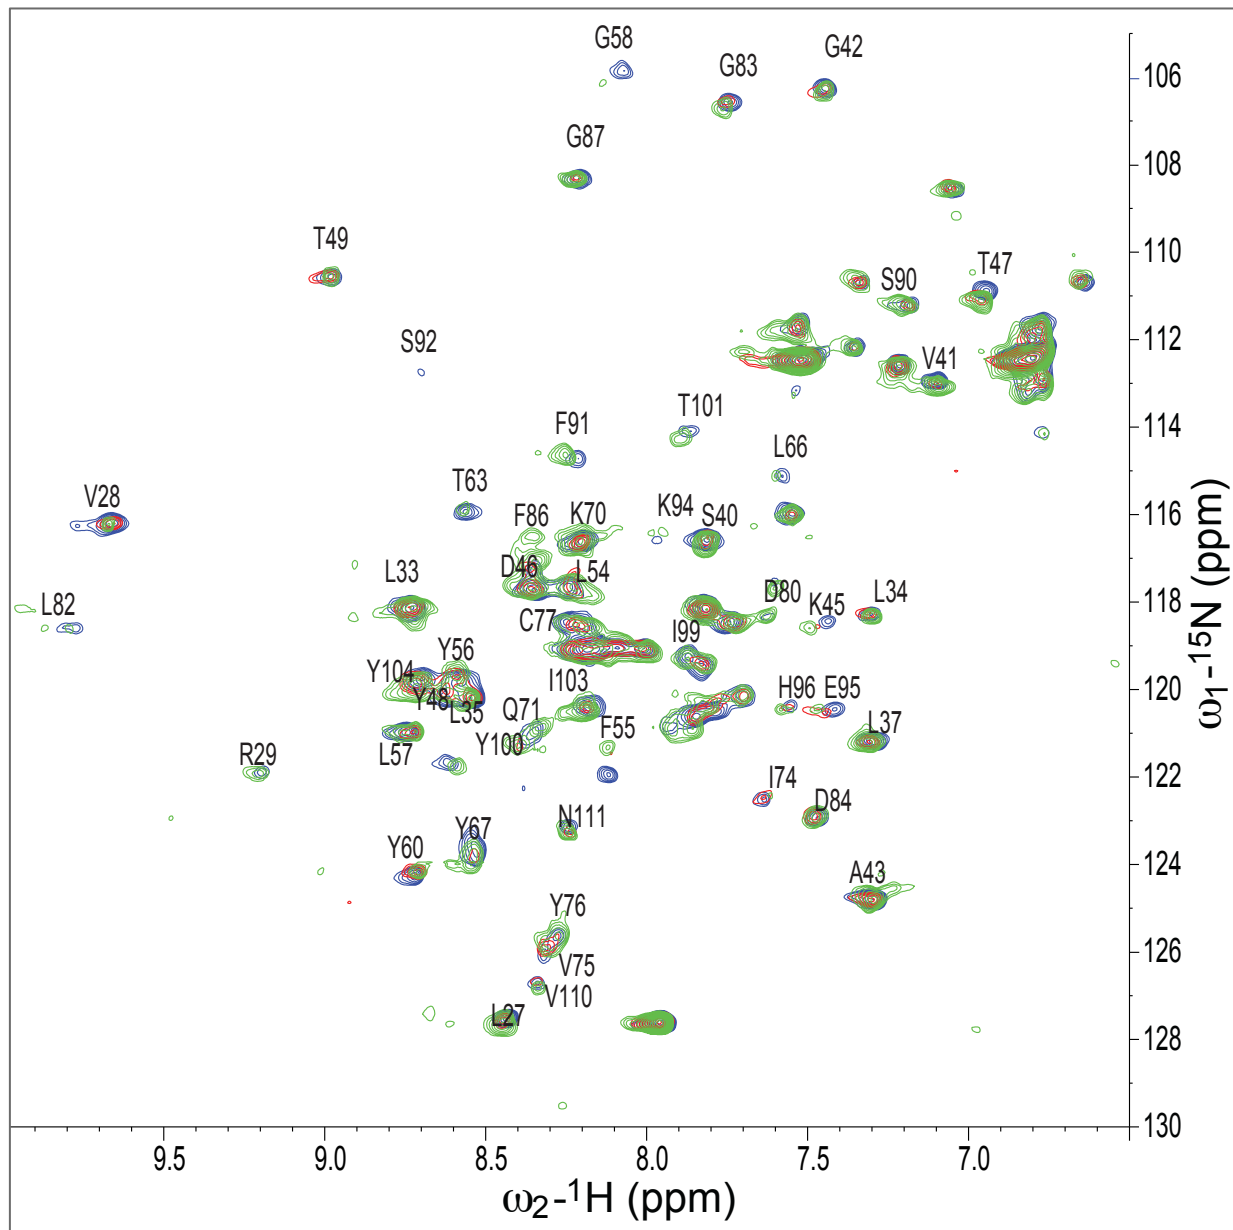

(b)

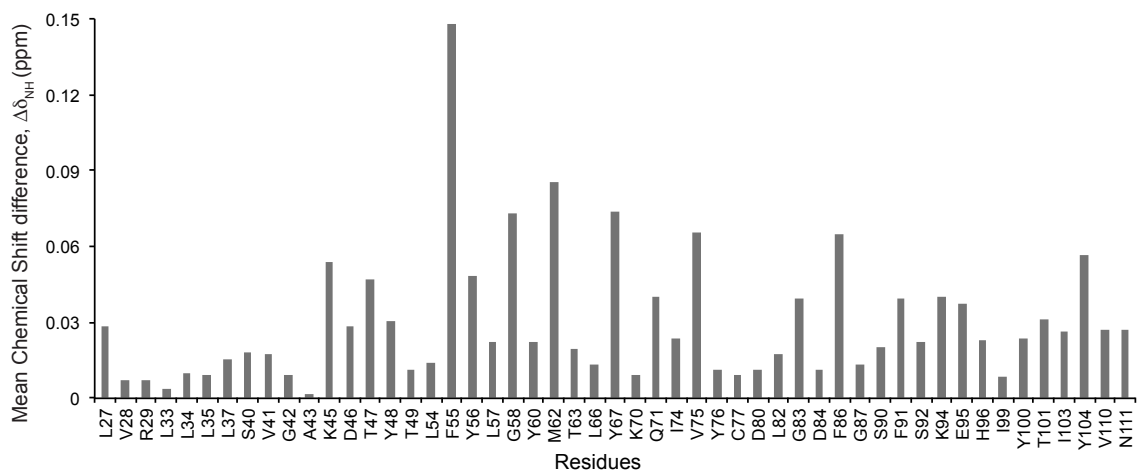

**Figure S4.  $^1\text{H}$ - $^{15}\text{N}$  HSQC titration spectra.** (a) Spectra of MDM2 (blue), Mdm2:F(3-Cl)WFL **18** (1:0.2, red), and Mdm2:F(3-Cl)WFL **18** (1:0.5, green) are overlaid. Mdm2 assignments are previously described in the literature.<sup>1,2</sup> (b) Mean chemical shift difference ( $\Delta\delta_{NH}$ ) plot depicting changes in residues.<sup>3</sup>

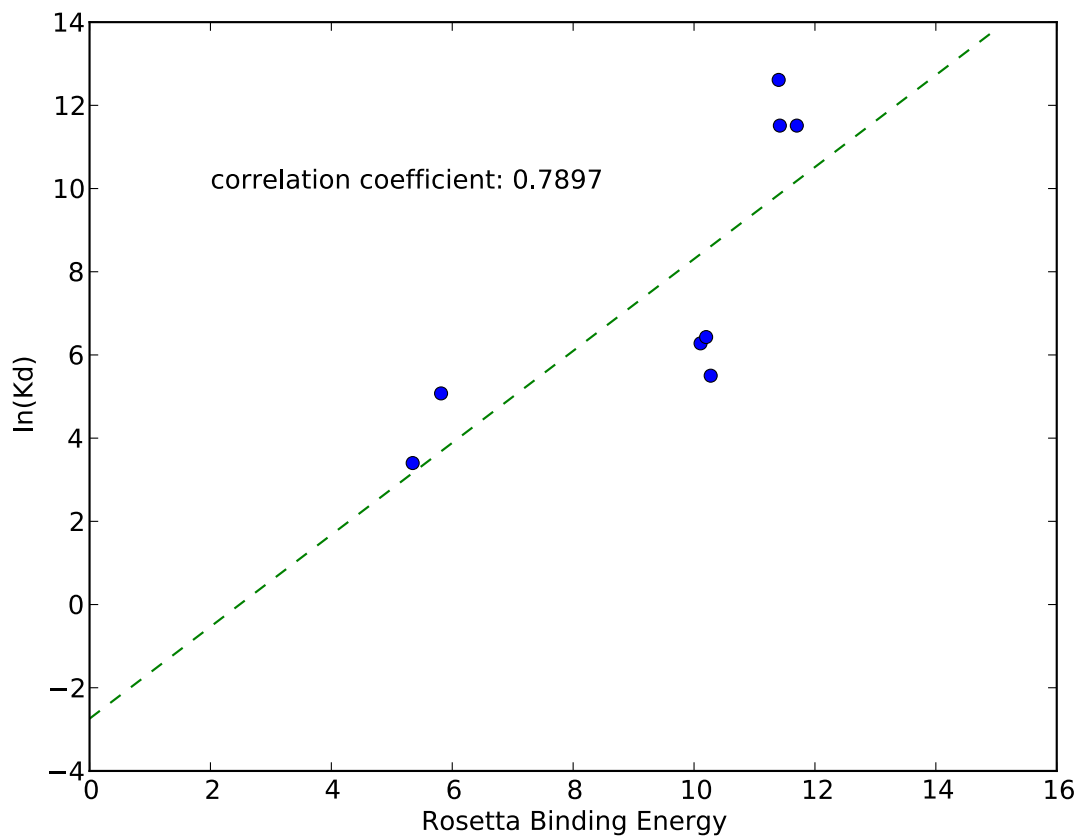

**Figure S5.** Correlation of Rosetta binding energy predictions with experimental  $K_d$  for p300–CH1 ligands. Data points are taken from Table S4, and correlation coefficient was calculated using Python’s `scipy.stats.stats.pearsonr` function. Rosetta binding energy (x axis) approximates free energy of binding which is proportional to  $\ln(K_d)$ . Explicitly:  $\Delta G = RT\ln(K_d)$  where  $R$  = ideal gas constant and  $T$  = temperature.



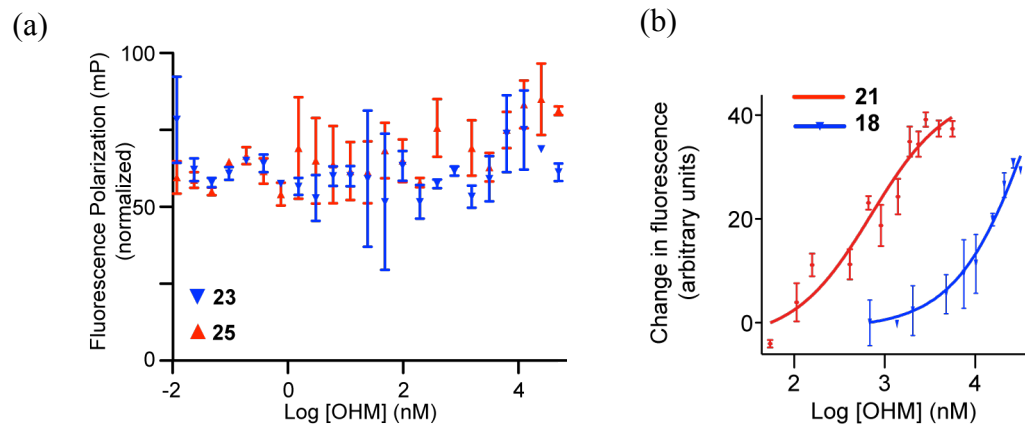

**Figure S6.** Determination of oxopiperazine analog binding to (a) His<sub>6</sub>-tagged Mdm2 by a fluorescence-polarization assay and (b) p300-CH1 by a tryptophan fluorescence spectroscopy.

**Table S1:** Noncanonical amino acid design library for Rosetta applied to MDM2 target

| <b>Position R<sub>1</sub></b><br>Rosetta code: noncanonical amino acid name |                                            |
|-----------------------------------------------------------------------------|--------------------------------------------|
| NC A12: 2,4-dimethyl-phenylalanine                                          | NC C01: beta-cyclopentyl-alanine           |
| NC A31: 2-amino-5-phenyl-pentanoic_acid                                     | NC C02: beta-cyclopentyl-alanine_puck      |
| NC A34: 2-aminomethyl-phenylalanine                                         | NC C11: cyclohexyl-glycine_boat            |
| NC A43: 2-hydroxy-phenylalanine                                             | NC C12: cyclohexyl-glycine_chair           |
| NC A48: 2-methyl-phenylalanine                                              | NC B21: 4-hydroxy-phenylglycine            |
| NC A68: 3-aminomethyl-phenylalanine                                         | NC B44: 9-anthryl-alanine                  |
| NC A69: 3-amino-tyrosine                                                    | NC B67: beta-(1-naphthyl)-alanine          |
| NC A78: 3-hydroxy-phenylalanine                                             | NC B74: beta-(2-naphthyl)-alanine          |
| NC A80: 3-hydroxy-tyrosine                                                  | NC C15: diphenylglycine                    |
| NC A84: 3-methyl-phenylalanine                                              | NC C42: phenylglycine                      |
| NC A94: 4-aminomethyl-phenylalanine                                         | NC C95: 3-chloro-phenylalanine             |
| NC APA: 4-amino-phenylalanine                                               |                                            |
| NC B12: 4-carboxy-phenylalanine                                             | <b>Position R<sub>4</sub></b>              |
| NC B27: 4-methyl-phenylalanine                                              | Rosetta code: noncanonical amino acid name |
| NC B30: 4-phenyl-phenylalanine                                              |                                            |
| NC B31: 4-tert-butyl-phenylalanine                                          | NC A30: 2-amino-4-bromo-4-pentenoic_acid   |
| NC B96: beta.beta-diphenyl-alanine                                          | NC A91: 4.5-dehydro-leucine                |
| NC C43: phenyl-serine                                                       | NC B47: allo-isoleucine                    |
| NC B67: beta-(1-naphthyl)-alanine                                           | NC C91: fluoro-leucine_ent1                |
| NC B92: beta-beta-dicyclohexyl-alanine_boat_boat                            | NC C92: fluoro-leucine_ent2                |
| NC B93: beta-beta-dicyclohexyl-alanine_boat_chair                           | NC C93: hexafluoro-leucine                 |
| NC B94: beta-beta-dicyclohexyl-alanine_chair_boat                           | NC C61: trifluoro-leucine                  |
| NC B95: beta-beta-dicyclohexyl-alanine_chair_chair                          | NC C94: trifluoro-leucine_ent2             |
| NC B99: beta-cyclohexyl-alanine_boat                                        | NC HLU: homoleucine                        |
| NC C00: beta-cyclohexyl-alanine_chair                                       | NC A20: 2-allyl-glycine                    |
|                                                                             | NC ABA: amino-butyric acid                 |
|                                                                             | NC NLU: norleucine                         |
|                                                                             | NC NVL: norvaline                          |

**Table S2:** Rosetta predicted binding energy vs. experimental  $K_d$  ( $\mu\text{M}$ ) for MDM2 target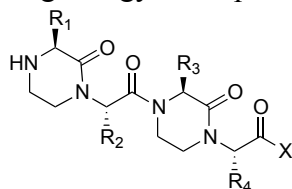

| Mimetic | R <sub>1</sub> | R <sub>2</sub> | R <sub>3</sub> | R <sub>4</sub> | $K_d$ ( $\mu\text{M}$ ) <sup>a</sup> | Rosetta binding energy |
|---------|----------------|----------------|----------------|----------------|--------------------------------------|------------------------|
| 18      | Phe(3-Cl)      | Trp            | Phe            | Leu            | $0.3 \pm 0.04$                       | -8.7                   |
| 13      | Phe            | Trp            | Phe            | Nle            | $2.5 \pm 0.5$                        | -8.4                   |
| 1       | Phe            | Trp            | Ala            | Leu            | $65 \pm 8$                           | -7.9                   |
| 19      | Phe(3-Me)      | Trp            | Phe            | Leu            | $2.6 \pm 0.04$                       | -7.9                   |
| 16      | Tyr            | Trp            | Phe            | Leu            | $0.4 \pm 0.05$                       | -7.3                   |
| 20      | Phe(4-Cl)      | Trp            | Phe            | Leu            | $1.3 \pm 0.1$                        | -6.2                   |
| 5       | Phe            | Trp            | Phe            | Leu            | $2.9 \pm 0.1$                        | -5.1                   |
| 15      | Nap            | Trp            | Phe            | Leu            | $0.9 \pm 0.1$                        | -5.0                   |
| 7       | Lys            | Trp            | Phe            | Leu            | $\geq 200$                           | -4.5                   |
| 8       | Phe            | Ala            | Phe            | Leu            | $64 \pm 7$                           | -4.5                   |
| 23      | Leu            | Nle            | Ala            | Gln            | $>50$                                | 0.6                    |
| 25      | Hle            | Hle            | Ala            | Gln            | $>50$                                | 2.2                    |
| 6       | Phe            | Trp            | Phe            | Lys            | $\geq 200$                           | 5.5                    |

**Table S3:** Noncanonical amino acid design library for Rosetta applied to p300 target

| <b>Positions R<sub>1</sub> and R<sub>2</sub></b>   |                                       |
|----------------------------------------------------|---------------------------------------|
| Rosetta code: noncanonical amino acid name         |                                       |
| NC A04: 1-amino-cyclopentane-carboxylic_acid_puck1 | NC B96: beta.beta-diphenyl-alanine    |
| NC A05: 1-amino-cyclopentane-carboxylic_acid_puck2 | NC B97: beta-chloro-alanine           |
| NC A12: 2,4-dimethyl-phenylalanine                 | NC B99: beta-cyclohexyl-alanine_boat  |
| NC A20: 2-allyl-glycine                            | NC C00: beta-cyclohexyl-alanine_chair |
| NC A24: 2-amino-2-phenylbutyric_acid               | NC C01: beta-cyclopentyl-alanine      |
| NC A30: 2-amino-4-bromo-4-pentenoic_acid           | NC C02: beta-cyclopentyl-alanine_puck |
| NC A31: 2-amino-5-phenyl-pentanoic_acid            | NC C03: beta-fluoro-alanine           |
| NC A33: 2-amino-heptanoic_acid                     | NC C05: beta-iodo-alanine             |
| NC A34: 2-aminomethyl-phenylalanine                | NC C11: cyclohexyl-glycine_boat       |
| NC A44: 2-indanyl-glycine_puck1                    | NC C12: cyclohexyl-glycine_chair      |

|                                                              |                                |
|--------------------------------------------------------------|--------------------------------|
| NC A45: 2-indanyl-glycine_puck2                              | NC C15: diphenylglycine        |
| NC A48: 2-methyl-phenylalanine                               | NC C16: dipropyl-glycine       |
| NC A84: 3-methyl-phenylalanine                               | NC C20: ethionine              |
| NC A91: 4.5-dehydro-leucine                                  | NC C91: fluoro-leucine_ent1    |
| NC B04: 4-amino-tetrahydrothiopyran-4-carboxylic_acid_boat1  | NC C92: fluoro-leucine_ent2    |
| NC B05: 4-amino-tetrahydrothiopyran-4-carboxylic_acid_boat2  | NC C93: hexafluoro-leucine     |
| NC B06: 4-amino-tetrahydrothiopyran-4-carboxylic_acid_chair1 | NC HLU: homoleucine            |
| NC B07: 4-amino-tetrahydrothiopyran-4-carboxylic_acid_chair2 | NC C26: homocysteine           |
| NC C90: 4-fluoro-tryptophan                                  | NC C27: homophenylalanine      |
| NC B27: 4-methyl-phenylalanine                               | NC MAL: MAL                    |
| NC B28: 4-methyl-tryptophan                                  | NC C12: MPA                    |
| NC B30: 4-phenyl-phenylalanine                               | NC C36: n-in-methyl-tryptophan |
| NC B31: 4-tert-butyl-phenylalanine                           | NC NLU: norleucine             |
| NC C80: 5-bromo-tryptophan                                   | NC NVL: norvaline              |
| NC C81: 5-chloro-tryptophan                                  | NC C41: penicillamine          |
| NC B35: 5-fluoro-tryptophan                                  | NC C42: phenylglycine          |
| NC B38: 5-methyl-tryptophan                                  | NC C53: tert-butyl-alanine     |
| NC C83: 6-bromo-tryptophan                                   | NC C54: tert-butyl-cysteine    |
| NC C84: 6-chloro-tryptophan                                  | NC C55: tert-butyl-glycine     |
| NC C85: 6-fluoro-tryptophan                                  | NC C60: trifluoro-alanine      |
| NC B40: 6-methyl-tryptophan                                  | NC C61: trifluoro-leucine      |
| NC C86: 7-azatryptophan                                      | NC C94: trifluoro-leucine_ent2 |
| NC C87: 7-bromo-tryptophan                                   |                                |
| NC C88: 7-methyl-tryptophan                                  |                                |
| NC B44: 9-anthryl-alanine                                    |                                |
| NC ABA: aminobutyric acid                                    |                                |
| NC B47: allo-isoleucine                                      |                                |
| NC B57: alpha-methyl-leucine                                 |                                |
| NC B58: alpha-methyl-phenylalanine                           |                                |
| NC B60: alpha-methyl-tryptophan                              |                                |
| NC B62: alpha-methyl-valine                                  |                                |
| NC B67: beta-(1-naphthyl)-alanine                            |                                |
| NC B74: beta-(2-naphthyl)-alanine                            |                                |
| NC B92: beta-beta-dicyclohexyl-alanine_boat_boat             |                                |
| NC B93: beta-beta-dicyclohexyl-alanine_boat_chair            |                                |
| NC B94: beta-beta-dicyclohexyl-alanine_chair_boat            |                                |
| NC B95: beta-beta-dicyclohexyl-alanine_chair_chair           |                                |

**Table S4:** Rosetta predicted binding energy vs. experimental  $K_d$  (nM) for p300 target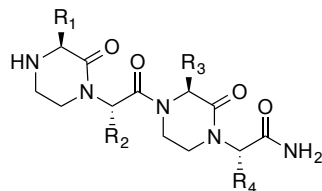

| Mimetic   | R <sub>1</sub> | R <sub>2</sub> | R <sub>3</sub> | R <sub>4</sub> | $K_d$ ( $\mu$ M) <sup>a</sup> |      |
|-----------|----------------|----------------|----------------|----------------|-------------------------------|------|
| <b>23</b> | Leu            | Nle            | Ala            | Gln            | 0.03 ± 0.01                   | 5.34 |
| <b>25</b> | Hle            | Hle            | Ala            | Gln            | 0.16 ± 0.06                   | 5.80 |
| <b>30</b> | Leu            | Hle            | Ala            | Gln            | ND                            | 6.42 |
| <b>31</b> | Hle            | Nle            | Ala            | Gln            | ND                            | 9.63 |
| <b>21</b> | Leu            | Leu            | Ala            | Gln            | 0.53 ± 0.14                   | 10.1 |
| <b>26</b> | Leu            | Leu            | Ala            | Ala            | 0.62 ± 0.27                   | 10.2 |
| <b>24</b> | Met            | Met            | Ala            | Gln            | 0.24 ± 0.04                   | 10.3 |
| <b>28</b> | Hle            | Leu            | Ala            | Gln            | ND                            | 10.4 |
| <b>22</b> | Leu            | Ala            | Ala            | Gln            | >10                           | 11.4 |
| <b>18</b> | Phe(3-Cl)      | Trp            | Phe            | Leu            | >30                           | 11.4 |
| <b>27</b> | Ala            | Ala            | Ala            | Ala            | >10                           | 11.7 |
| <b>29</b> | Met            | Leu            | Ala            | Gln            | ND                            | 11.9 |

\*ND = not determined

**Synthesis of oxopiperazine dimers.** Commercial grade solvents and reagents were used without further purification. Fmoc amino acids and peptide synthesis reagents were purchased from Novabiochem. Molecular biology grade salts and buffers were obtained from Sigma. An Fmoc amino acid linked to Knorr Rink Amide resin was extended to a dipeptide using standard Fmoc solid phase peptide synthesis methods in a solid phase reaction vessel.<sup>4</sup> The resultant dipeptide was deprotected with 20% piperidine/dimethylformamide (DMF) and resin was washed sequentially with DMF, dichloromethane (DCM), methanol (MeOH), and diethyl ether and dried under vacuum. *o*-Nitrobenzenesulfonyl chloride (Ns-Cl, 10 eq) and collidine (10 eq) were dissolved in dry DCM and added to the reaction vessel. The mixture was shaken for 2 hours at 23°C to obtain **II**. The resin was washed with sequentially with DMF, DCM, MeOH, and diethyl ether and dried for 12 hours under vacuum. The resin was transferred to a glass microwave tube (CEM). Triphenylphosphine (PPh<sub>3</sub>, 10 eq) was added and the tube was flushed with nitrogen gas for 30 minutes. Tetrahydrofuran (THF), diisopropyl azodicarboxylate (DIAD, 10 eq), and 2-bromoethanol (10 eq) were added and the reaction mixture was subjected to microwave irradiation (200 watts, 250 psi) for 10 minutes at 100°C. Resin was washed sequentially with THF, DMF, and DCM. The resin was transferred to a solid phase vessel and treated with 1,8-diazabicyclo[5.4.0]undec-7-ene (DBU) in THF for 2 hours. Resin was washed with THF, DMF, DCM, and diethyl ether, allowed to dry for 30 minutes, and then treated with DBU and 2-mercaptoethanol in DMF for 2 hours. Compound **III** was then washed with DMF, DCM, MeOH and diethyl ether and dried. The desired pre-activated Fmoc-amino acid was added to the resin and the mixture was shaken at 23°C for 12 hours affording **IV**. Nosyl protection and the ring formation steps were repeated to obtain oxopiperazine dimers **V** after

cleavage from the resin with 95% trifluoroacetic acid (TFA), 2.5% water, and 2.5% triisopropylsilane (TIPS).

**Mdm2 Protein Expression and Purification.** Competent BL21 DE3 pLySS *E. coli* cells were transformed by the heat shocking the bacteria at 42° C for 1 min in media containing a pET-14B vector containing a His6-tagged MDM2<sub>25-117</sub> fusion protein. Cells were grown on ampicillin containing agar plates (50 mg/mL), and a single culture was used to inoculate a 100 mL overnight culture of LB media containing ampicillin (50 mg/mL). 500 mL of terrific broth (4L flask) was seeded with 25 mL of overnight culture and incubated at 30° C for 1.5 hours before induction of protein expression with 0.4 mM IPTG. The flask was incubated at 30° C for an additional 4.5 hours. The cells were harvest by centrifugation at 6000 g for 20 minutes and the supernatant was discarded. The cells were resuspended in 50 mL binding buffer (0.5 M NaCl, 20 mM Tris-HCl, 5 mM imidazole, pH 7.9), and lysed by sonication in ice (10 x 10 seconds pulses over 2 minutes). The cells were again centrifuged at 15,000 g for 20 minutes, and the resulting supernatant containing the desired MDM2 fusion protein was purified using a His-Bind® column affinity purification kit (Novagen). The resulting protein was dialyzed in 10 mM PBS with 5 mM EDTA and 0.5 mM DTT and characterized by SDS-PAGE analysis.

**Expression of <sup>15</sup>N-Mdm2.** The pET-14B vector containing a His6-tagged MDM2<sub>25-117</sub> fusion protein was transformed into BL21(DE3) competent *E. coli* (Novagen) in M9 minimal media with <sup>15</sup>NH<sub>4</sub>Cl as the main nitrogen source. Protein production was induced with 0.4 mM IPTG at O.D.600 and incubated for 16 hours at 15 °C. Bacteria were harvested and resuspended in the lysis buffer with 20 mM Phosphate buffer (Research Products International, Corp.), 100 μM DTT (Fisher), 1 mM EDTA (Sigma), 0.5% TritonX 100 (Sigma), 1 mg/mL Pepstatin A

(Research Products International, Corp.), 10 mg/mL Leupeptin A (Research Products International, Corp.), 500  $\mu$ M PMSF (sigma), and 0.5% glycerol at pH 8.0. Pellets were lysed by sonication and centrifuged at 4 °C 20,000 rpm for 20 min. Fusion protein was collected from the bacterial supernatant and the resulting supernatant containing the desired MDM2 fusion protein was purified using a His-Bind® column affinity purification kit (Novagen). The resulting protein was dialyzed in 10 mM PBS with 5 mM EDTA and 0.5 mM DTT and characterized by SDS-PAGE analysis.

**p300-CH1 Plasmids.** The DNA sequence of human p300 CH1 domain (amino acid residues 323-423) was subcloned into a pUC57 plasmid by Genscript, Inc. After transformation of JM109 bacteria (Promega) with the plasmid, it was amplified and purified. Then the gene of interest was subcloned between *Bam*HI and *Eco*RI restriction sites of pGEX-4T-2 expression vector (Amersham).

**p300-CH1 Protein Expression and Purification.** The pGEX-4T-2-p300 fusion vector was transformed into BL21(DE3) competent *E.coli* (Novagen) in M9 minimal media with  $^{15}$ NH<sub>4</sub>Cl as the primary nitrogen source. Protein production was induced with 1 mM IPTG at OD<sub>600</sub> of 1 for 16 hours at 15 °C. Production of the desired p300-CH1-GST fusion product was verified by SDS-PAGE. Bacteria were harvested and resuspended in the lysis buffer with 20 mM Phosphate buffer (Research Products International, Corp.), 100  $\mu$ M DTT (Fisher), 100  $\mu$ M ZnSO<sub>4</sub> (Sigma), 0.5% TritonX 100 (Sigma), 1 mg/mL Pepstatin A (Research Products International, Corp.), 10 mg/mL Leupeptin A (Research Products International, Corp.), 500  $\mu$ M PMSF (Sigma), and 0.5% glycerol at pH 8.0. Pellets were lysed by sonication and centrifuged at 4 °C and 20,000 rpm for



20 min. Fusion protein was collected from the bacterial supernatant and purified by affinity chromatography using glutathione Sepharose 4B beads (Amersham) prepared according to the manufacturer's directions. GST-tag was cleaved by thrombin and protein was eluted from resin. Collected fractions were assayed by SDS-PAGE gel; pooled fractions were treated with protease inhibitor cocktail (Sigma) and against a buffer containing 10 mM Tris, 50 mM NaCl, 2mM DTT (Fisher), 3 equivalents ZnSO<sub>4</sub> at pH 8.0 to ensure proper folding (*vide supra*).

**<sup>1</sup>H-<sup>15</sup>N HSQC NMR Spectroscopy.** Protein samples were prepared as described above. Uniformly <sup>15</sup>N-labeled N-terminal His<sub>6</sub>-tagged Mdm2<sub>25-117</sub> was concentrated to 50 μM in NMR buffer (10 mM PBS pH 7.4, 5 mM EDTA, 0.5 mM DTT) using 3 kDa MWCO Amicon Ultra centrifugal filter (Millipore) and supplemented with 5% D<sub>2</sub>O. For HSQC titration experiments, data was collected on a 600 MHz Bruker four-channel NMR system at 25 °C and analyzed with the TopSpin software (Bruker).

For the HSQC titration experiments, 0.2 and 0.5 molar equivalents of compound **18** (F(3-Cl)WFL) in DMSO were added to <sup>15</sup>N-labelled Mdm2, and the data was collected as described above. Mean chemical shift difference ( $\Delta\delta_{\text{NH}}$ ) observed for <sup>1</sup>H and <sup>15</sup>N nuclei of various resonances were calculated as described,<sup>3</sup> where  $\alpha$  is the range of H ppm shifts divided by the range of NH ppm shifts ( $\alpha = 1/9$ ).

$$d = \sqrt{\frac{1}{2}[\delta_H^2 + (\alpha \cdot \delta_N^2)]} \quad \mathbf{(1)}$$

**Fluorescence Polarization Assay.** The relative affinity of peptides for  $^{15}\text{N}$ -labeled N-terminal His<sub>6</sub>-tagged MDM2<sub>25-117</sub> was determined using fluorescence polarization binding assay with fluoresceine-tagged p53. The polarization experiments were performed with a DTX 880 Multimode Detector (Beckman) at 25° C, with excitation and emission wavelengths of 485 and 525 nm, respectively. Addition of an increasing concentration (0 nm to 3.5  $\mu\text{M}$ ) of MDM2 protein to a 15 nM solution of fluorescein labeled p53 peptide in 10 mM PBS pH 7.4, 5 mM EDTA, 0.5 mM DTT, and 0.1% pluronic F-68 (Sigma) in 96 well plates afforded the IC<sub>50</sub> value, which was fit into equation (2) to calculate the dissociation constant ( $K_D$ ) for the Mdm2/p53 complex.<sup>5</sup> The binding affinity ( $K_D$ ) reported for each peptide is the average of three individual experiments, and were determined by fitting the experimental data to a sigmoidal dose-response nonlinear regression model on GraphPad Prism 5.0.

$$K_D = (R_T \times (1-F_{SB}) + L_{ST} \times F_{SB}^2) / F_{SB} - L_{ST} \quad (2)$$

where,

$R_T$  = Total concentration of Mdm2

$L_{ST}$  = Total concentration of fluorescent peptide

$F_{SB}$  = Fraction of bound fluorescent peptide

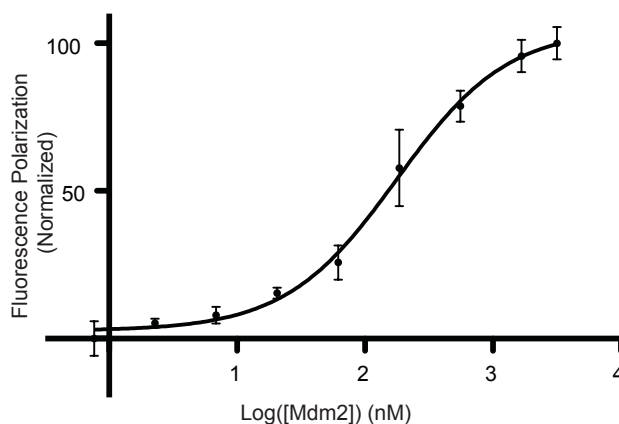

**Figure S7:** Direct binding of Flu-p53 to Mdm2.

The  $K_D$  of Flu-p53 was determined to be  $169 \pm 7$  nM. For competitive inhibition experiments, a solution of 250 nM Mdm2 and 15 nM Flu-p53 in buffer (10 mM PBS pH 7.4, 5 mM EDTA, 0.5 mM DTT, and 0.1% pluronic F-68) was incubated at 25 °C in a 96 well plate. After 30 minutes appropriate concentrations of the oxopiperazine were added to the Mdm2/Flu-p53 solution and the resulting mixtures were incubated at 25° C for 30 minutes before measuring the degree of dissociation of Flu-p53 by polarization. The  $EC_{50}$  was fit into equation (2) to calculate the  $K_{D2}$  value of the oxopiperazine. The inhibition curves are shown in the main manuscript.

$$K_{D2} = K_D * F_{SB} * ((L_T / (L_{ST} * F_{SB2} - (K_D + L_{ST} + R_T) * F_{SB} + R_T)) - 1 / (1 - F_{SB})) \quad (3)$$

where:

$K_D$  =  $K_D$  of fluorescent probe Flu-p53

$R_T$  = Total concentration of Mdm2 protein

$L_{ST}$  = total concentration of p53 fluorescent peptide

$F_{SB}$  = Fraction of bound oxopiperazine (at  $EC_{50}$ )

$L_T$  = total concentration of oxopiperazine ( $EC_{50}$ )

**Tryptophan Fluorescence Binding Assay.** Spectra were recorded on a QuantaMaster 40 spectrofluorometer (Photon Technology International) in a 10 mm quartz fluorometer cell at 25°C with 4 nm excitation and 4 nm emission slit widths from 200 to 400 nm at intervals of 1 nm/s. Samples were excited at 295 nm and fluorescence emission was measured from 200-400 nm and recorded at 335 nm. Peptides stock solutions were prepared in DMSO. Aliquots containing 1  $\mu$ L DMSO stocks were added to 400  $\mu$ L of 1  $\mu$ M p300-CH1 in 50 mM Tris and 100 mM NaCl (pH 8.0). After each addition, the sample was allowed to equilibrate for 5 minutes before UV analysis. Background absorbance and sample dilution effects were

corrected by titrating DMSO into p300-CH1 in an analogous manner. Final fluorescence is reported as the absolute value of  $[(F_1-F_0)/F_1]*100$ , where  $F_1$  is the final fluorescence upon titration, and  $F_0$  is the fluorescence of the blank DMSO titration.  $EC_{50}$  values for each peptide were determined by fitting the experimental data to a sigmoidal dose-response nonlinear regression model in GraphPad Prism 5.0, and the dissociation constants,  $K_D$ , were obtained from equation (2).

## Compound Characterization

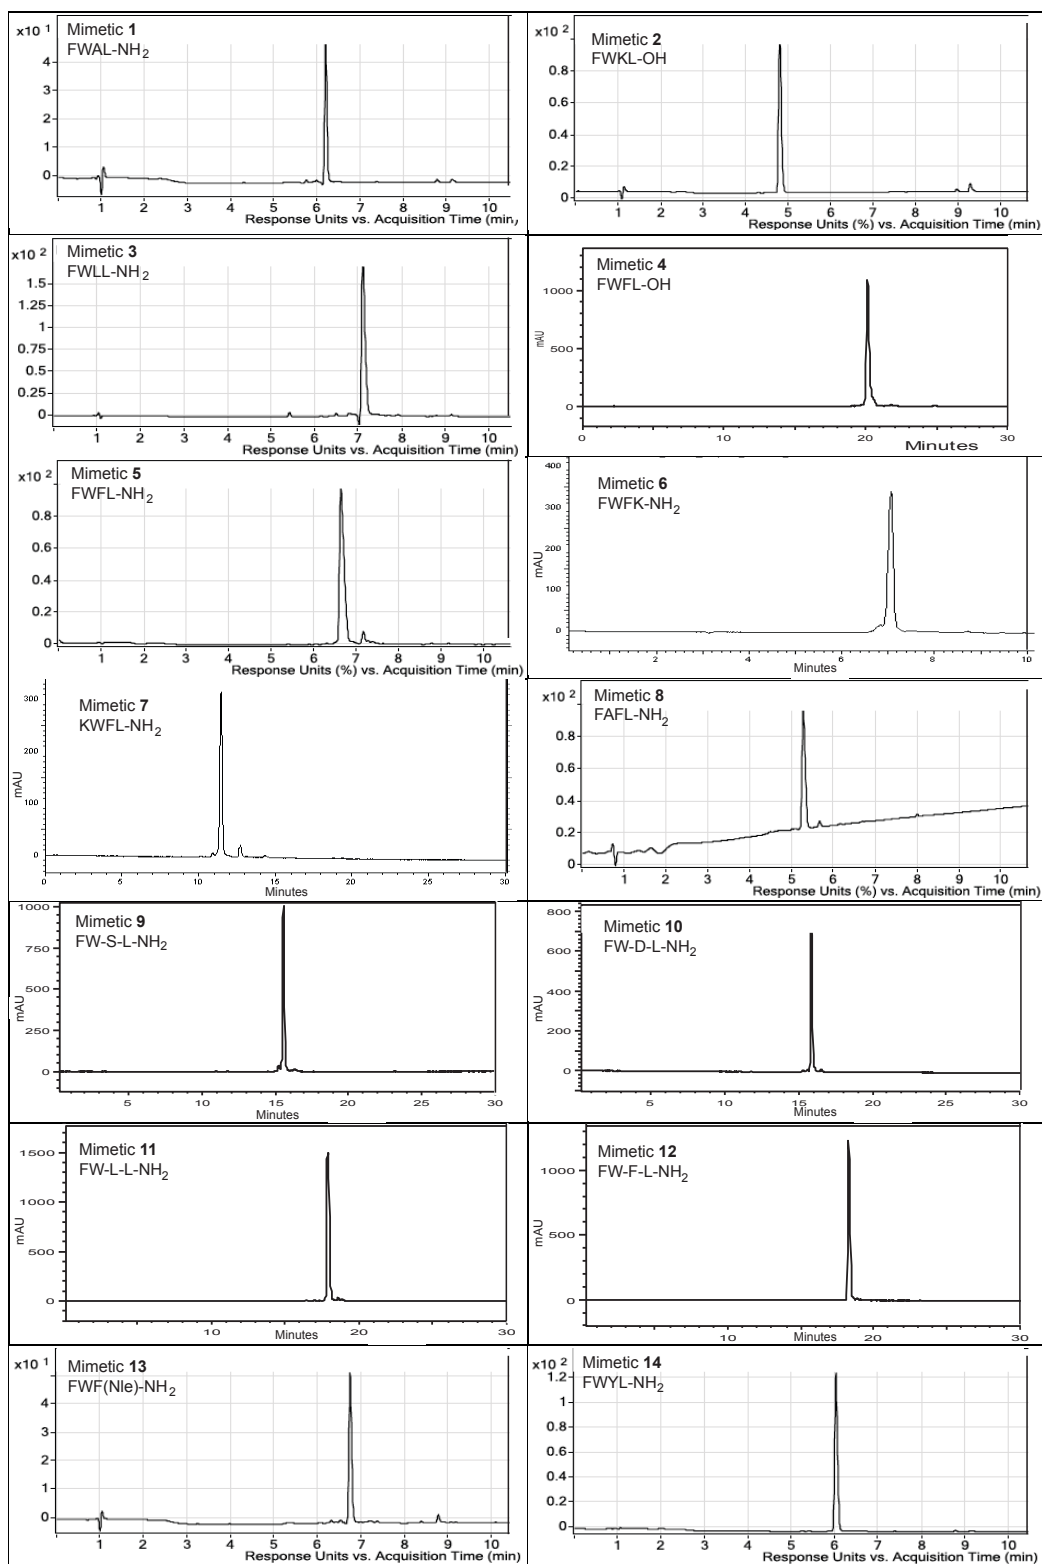

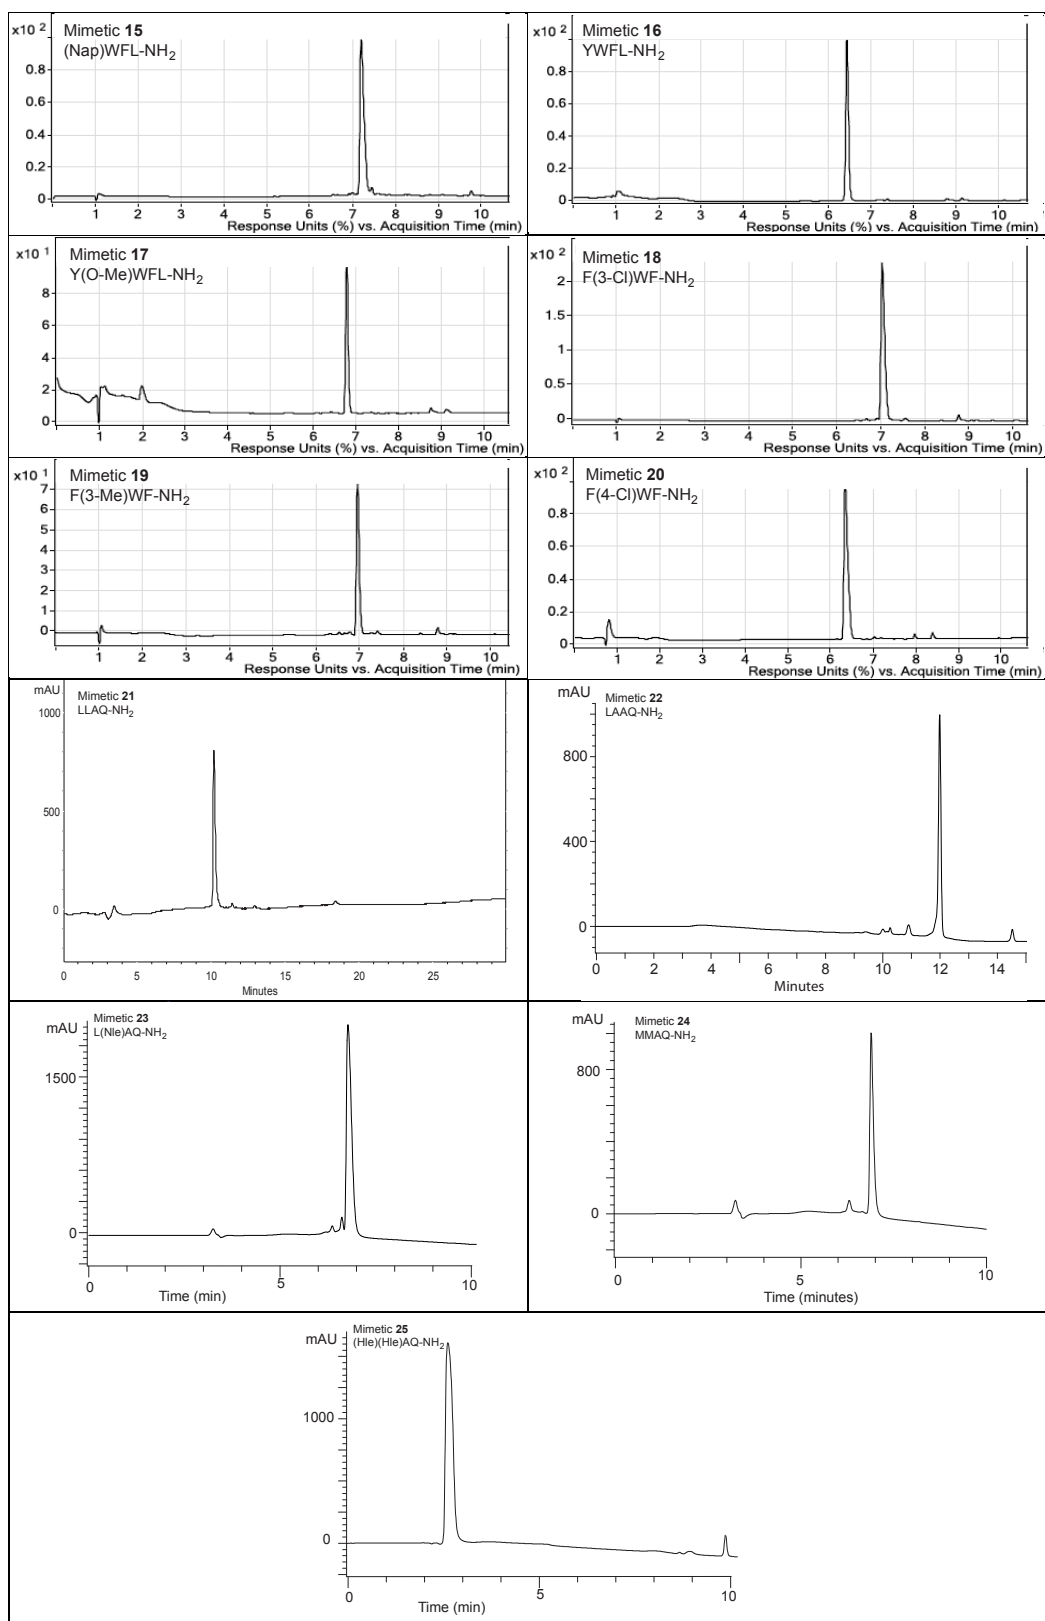

**Figure S6:** Analytical HPLC traces of oxopiperazines and monomer-peptides. HPLC conditions: Compounds 1-3, 5,13-20 : 5% to 95% acetonitrile in water (0.1% formic acid) in 10 minutes. UV trace at 280 nm.

Compounds **4**, **7**, **9-12**: 5% to 95% acetonitrile in water (0.1% trifluoroacetic acid) in 30 minutes. UV trace at 280 nm.

Compounds **6**: 5% to 95% acetonitrile in water (0.1% trifluoroacetic acid) in 10 minutes. UV trace at 280 nm.

Compounds **8** : 5% to 95% acetonitrile in water (0.1% formic acid) in 10 minutes. UV trace at 220 nm.

Compound **21**: 5% to 95% acetonitrile in water (0.1% formic acid) in 30 minutes. UV trace at 220 nm.

Compound **22**: 5% to 95% acetonitrile in water (0.1% trifluoroacetic acid) in 10 minutes; 95% to 100% from 10-15 minutes. UV trace at 230 nm.

Compound **23-25**: 5% to 95% acetonitrile in water (0.1% trifluoroacetic acid) in 10 minutes. UV trace at 220 nm.

## Experimentals

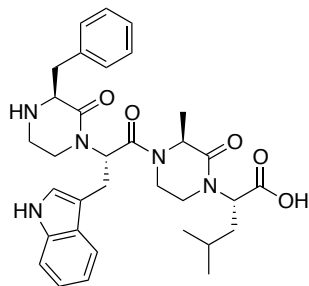

### Oligooxopiperazine 1- FWAL-OH

$^1\text{H-NMR}$  (600 MHz,  $d_6$ -DMSO)  $\delta$  10.93 (s, 0.3H), 10.89 (s, 0.7H), 9.35 (br, 1.0H), 8.23 (br, 1.0H), 7.64 (d,  $J = 7.86$ , 0.8H), 7.60 (d,  $J = 7.92$ , 0.2H), 7.37-7.14 (m, 5.0H), 7.13-6.97 (m, 3.0H), 5.72 (dd,  $J = 8.58$ , 6.48, 0.8H), 5.59 (app. t,  $J = 7.62$ , 0.2H), 4.97 (dd,  $J = 11.46$ , 7.02, 0.8H), 4.95-4.92 (m, 0.2H), 4.63 (q,  $J = 6.86$ , 1.0H), 4.15 (br, 1.0H), 3.80 (dt,  $J = 13.60$ , 3.60, 1.0H), 3.59 (br, 1.0H), 3.51-3.44 (m, 1.0H), 3.27-3.15 (m, 3.0H), 3.14-3.07 (m, 1.0H), 3.05-2.95 (m, 1.0H), 2.58-2.53 (m, 4.0H), 1.80-1.68 (m, 1.0H), 1.66-1.52 (m, 1.0H), 1.42-1.32 (m, 1.0H), 1.29 (d,  $J = 7.02$ , 2.0H), 1.01 (d,  $J = 6.55$ , 0.6H), 0.92 (d,  $J = 6.55$ , 0.4H), 0.89 (d,  $J = 6.55$ , 2.1H), 0.87 (d,  $J = 6.55$ , 0.9H), 0.83 (d,  $J = 6.55$ , 2.1H), 0.81 (d,  $J = 6.55$ , 0.9H). HRMS (ESI)  $\text{C}_{33}\text{H}_{41}\text{N}_5\text{O}_5$   $[\text{M}+\text{H}]^+$  calc'd= 588.3108; found = 588.3311

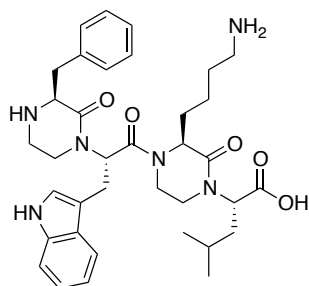

### Oligooxopiperazine 2- FWKL-OH

$^1\text{H-NMR}$  (400 MHz, MeOD) (data for the major rotamer)  $\delta$  7.70 (d,  $J = 8.90$ , 1.0H), 7.60 (d,  $J = 7.8$ , 0.5H), 7.50 (d,  $J = 7.4$ , 0.5H), 7.40-7.20 (m, 4.0H), 7.20-6.90 (m, 4.0H), 5.80-5.67 (m, 2.0H), 5.12-5.00 (m, 2.0H), 4.49-4.40 (m, 1.6H), 4.34 (app d,  $J = 11.90$ , 1.4H), 4.24-4.08 (m, 2.5H), 3.82-3.51 (m, 5.5H), 2.98-2.75 (m, 5.0H), 2.71-2.58 (m, 2.0H), 2.26 (t,  $J = 7.90$ , 1.7H), 1.80-1.56 (m, 4.3H), 1.50-1.31 (m, 2.8H), 1.29-1.17 (m, 2.3H), 1.15 (s, 0.6H), 0.88 (d,  $J = 6.70$ , 3.0H), 0.82 (d,  $J = 6.10$ , 3.0H). HR-MS (ESI)  $\text{C}_{36}\text{H}_{48}\text{N}_6\text{O}_5$   $[\text{M}+\text{H}]^+$  calc'd= 645.3686; found= 645.4044

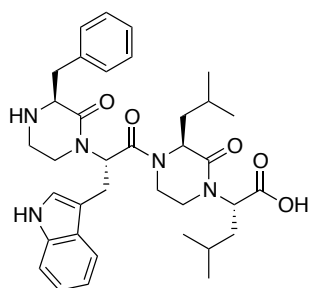

### Oligooxopiperazine 3- FWLL

$^1\text{H-NMR}$  (600 MHz,  $d_6$ -DMSO)  $\delta$  10.89 (br s, 1.0H), 9.34 (br d, 1.0H), 7.62 (d,  $J = 7.84$ , 1.4H), 7.60 (d,  $J = 7.84$ , 0.6H), 7.34 (d  $J = 7.84$ , 2.0H), 7.30 (br s, 1.0H), 7.22-7.11 (m, 2.0H), 7.11-7.06 (m, 1.0H), 7.01 (q,  $J = 7.53$ , 1.5H), 6.53 (s, 0.5H), 5.73 (t,  $J = 7.40$ , 0.6H), 5.60-5.51 (m, 0.6H), 4.96 (dd,  $J = 11.85$ , 7.50, 0.4H), 4.90 (dd,  $J = 11.74$ , 7.08, 0.6H), 4.77 (t,  $J = 6.69$ , 0.6H), 4.52 (br, 0.4H), 3.84 (br, 1.0H), 3.56 (br, 1.5H), 3.23-3.17 (m, 3.5H), 3.09 (br, 1.0H), 3.02 (br, 1.0H), 2.87 (br, 1.0H), 1.78-1.69 (m, 1.5H), 1.66- 1.61 (m, 0.5H), 1.60-1.50 (m, 4.0H), 1.36-1.25 (m, 1.0H), 1.23 (s, 0.5H), 1.12 (br, 0.5H), 0.92-0.86 (m, 9.0H), 0.80 (d,  $J = 6.48$ , 1.0H) 0.78 (d,  $J = 6.48$ , 1.0H), 0.64 (d,  $J = 6.48$ , 1.0H), 0.56 (br, 0.7H). HRMS (ESI)  $\text{C}_{36}\text{H}_{47}\text{N}_5\text{O}_5$   $[\text{M}+\text{H}]^+$  calc'd= 630.3577; found= 630.4002

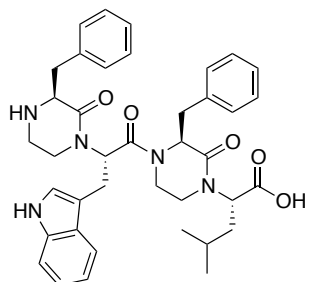

### Oligooxopiperazine 4- FWFL-OH

$^1\text{H-NMR}$  (400 MHz, MeOD)  $\delta$  7.51 (d,  $J = 7.88$ , 0.4H), 7.40 (d,  $J = 7.88$ , 0.6H), 7.34-7.20 (m, 5.0H), 7.16-6.97 (m, 8.4H), 6.79 (s, 0.6H), 5.85 (app. t,  $J = 7.90$ , 0.4H), 5.23 (t,  $J = 7.56$ , 0.6H), 5.20 (dd,  $J = 11.20$ , 6.08, 0.6H), 4.97 (t,  $J = 5.67$ , 0.4H), 4.93-4.87 (m, 1.0H), 4.42 (br, 0.6H), 4.21 (dd,  $J = 9.36$ , 4.84, 0.4H), 4.09 (dd,  $J = 9.88$ , 5.88, 0.6H), 3.78 (dt,  $J = 13.49$ , 3.63, 0.4H), 3.67-3.55 (m, 1.0H), 3.46 (app. t,  $J = 5.05$ , 1.3H), 3.44-3.39 (m, 0.5H), 3.35-3.30 (m, 0.5H), 3.29 (app. t,  $J = 3.72$ , 0.7H), 3.20-3.04 (m, 4.0H), 3.00-2.93 (m, 1.5H), 2.85 (dd,  $J = 14.9$ , 9.38, 0.4H), 2.69-2.62 (m, 1.0H), 2.50 (dd,  $J = 14.89$ , 9.79, 0.6H), 2.46-2.38 (m, 0.5H), 1.80-1.64 (m, 1.5H), 1.60-1.36 (m, 2.0H), 1.28-1.07 (m, 1.5H), 0.91 (d,  $J = 6.96$ , 2.0H), 0.89 (d,  $J = 6.76$ , 2.0H), 0.84 (d,  $J = 6.40$ , 1.0H), 0.80 (d,  $J = 6.64$ , 1.0H). LRMS  $\text{C}_{39}\text{H}_{45}\text{N}_5\text{O}_5$   $[\text{M}+\text{H}]^+$  calc'd= 664.3; found= 664.2



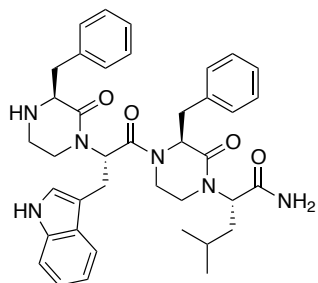

Oligooxopiperazine **5**- FWFL-NH<sub>2</sub>

<sup>1</sup>H-NMR (400 MHz, d<sub>6</sub>-DMSO) δ 10.89 (app. d, *J* = 1.74, 0.6H), 10.88 (s, 0.4H), 9.26 (br d, 2.0H), 7.57 (d, *J* = 7.76, 0.7H), 7.45 (d, *J* = 4.95, 0.7H), 7.42 (d, *J* = 4.06, 1.0H) 7.38-7.25 (m, 4.0H), 7.24-7.18 (m, 3.2H), 7.13-7.07 (m, 2.0H), 7.05-6.94 (m, 2.0H), 6.94-6.88 (m, 1.0H), 5.68 (dd, *J* = 8.72, 6.36, 0.6H), 5.32 (t, *J* = 7.44, 0.4H), 4.99 (dd, *J* = 10.17, 5.85, 4.32, 1.0H), 4.93 (t, *J* = 6.30, 0.6H), 4.78-4.72 (m, 0.4H), 4.20 (br, 0.5H), 4.17 (br, 0.5H), 3.75 (br, 0.5H), 3.71 (br, 0.5H), 3.26-3.04 (m, 7.0), 3.00-2.88 (m, 3.0H), 2.85 (br, 0.3H), 2.84 (br, 0.2H), 2.81-2.73 (m, 1.8H), 1.67-1.58 (m, 1.0H), 1.56-1.47 (m, 2.0H), 1.32 (br, 1.0H), 1.24 (br, 0.5H), 1.16 (br, 1.5H), 0.95-0.86 (m, 4.0H), 0.84 (d, *J* = 6.55, 2.0H). HRMS (ESI) C<sub>39</sub>H<sub>46</sub>N<sub>6</sub>O<sub>4</sub> [M+H]<sup>+</sup> calc'd = 663.3581; found = 663.3917

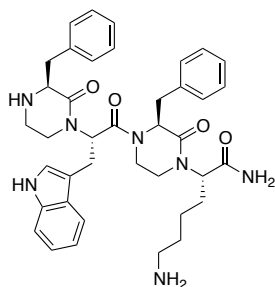

Oligooxopiperazine **6**- FWFK-NH<sub>2</sub>

<sup>1</sup>H-NMR (600 MHz, d<sub>6</sub>-DMSO) δ 10.88 (br, 1.0H), 8.46 (br, 0.7H), 9.30 (br d, 2.0H), 7.65 (br, 2.0H), 7.55 (d, *J* = 8.10, 0.3H), 7.52 (br, 0.3H), 7.49 (br, 0.3H), 7.40 (br, 1.0H), 7.39-7.25 (m, 4.0H), 7.24-7.06 (m, 6.0H), 7.04-6.98 (m, 1.0H), 6.92 (br, 0.7H), 6.76 (br, 0.3H), 6.53 (br, 2.0H), 5.88 (br, 0.4H), 5.69 (dd, *J* = 9.00, 6.42, 0.6H), 5.30 (br, 0.5H), 4.99 (br, 1.0H), 4.94-4.85 (m, 1.0H), 4.76 (br, 0.5H), 4.25 (br, 2.0H), 3.21-3.05 (m, 4.0H), 3.04-2.88 (m, 3.0H), 2.82-2.72 (m, 3.0H), 2.09 (s, 0.2H), 1.88-1.74 (m, 1.0H), 1.69-1.60 (m, 1.0H), 1.59-1.43 (m, 3.0H), 1.28-1.0 (m, 3.0H). HRMS (ESI) C<sub>39</sub>H<sub>47</sub>N<sub>7</sub>O<sub>4</sub> [M+H]<sup>+</sup> cal'd = 678.3846; found = 678.3861

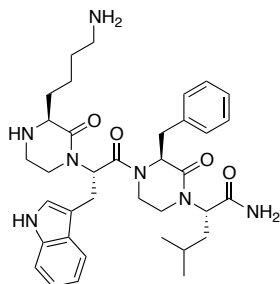

Oligooxopiperazine **7**- KWFL-NH<sub>2</sub>

<sup>1</sup>H-NMR (400 MHz, CDCl<sub>3</sub>) δ 9.78 (br, 1.0H), 7.99 (br, 2.0H), 7.75 (br, 1.0H), 7.42 (t, *J* = 6.63, 2.0H), 7.38-7.27 (m, 3.0H), 7.20 (d, *J* = 7.40, 1.5H), 7.08 (t, *J* = 7.17, 1.0H), 7.04-6.97 (m,

1.5H), 6.76 (s, 1.0H), 5.18-5.08 (m, 1.0H), 4.94-4.82 (m, 2.0H), 4.82-4.74 (m, 1.0H), 3.55-3.44 (m, 1.5H), 3.43-3.14 (m, 5.0H), 2.97 (t,  $J=12.06$ , 1.0H), 2.87 (br, 1.0H), 2.69 (br, 1.5H), 2.19-2.14 (m, 1.0H), 1.74-1.62 (m, 3.0H), 1.50 (br, 2.0H), 1.34-1.22 (m, 4.0H), 0.99 (d,  $J=5.55$ , 6.0H), 0.92-0.77 (m, 4.0H), 0.72 (br, 1.5H), 0.56 (br, 0.5H). HRMS (ESI)  $C_{36}H_{49}N_7O_4$   $[M+H]^+$  calc'd= 644.3746; found= 644.4091

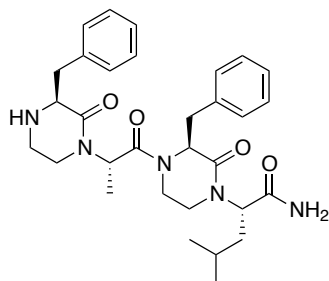

**Oligooxopiperazine 8-FAFL-NH<sub>2</sub>**

<sup>1</sup>H-NMR (600 MHz, d<sub>6</sub>-DMSO) δ 9.40 (br, 2.0H), 7.46 (s, 0.5H), 7.40-7.27 (m, 5.0H), 7.26-7.19 (m, 2.5H), 7.14-7.11 (m, 1.0H), 7.10-7.04 (m, 1.0H), 6.56 (br, 1.0H), 5.36 (dd,  $J=13.89$ , 6.99, 0.6H), 5.06 (q,  $J=5.32$ , 0.6H), 5.02 (q,  $J=5.55$ , 0.4H), 4.92 (t,  $J=5.40$ , 0.6H), 4.79-4.74 (m, 0.4H), 4.73 (t,  $J=6.74$ , 0.4H), 4.37 (br, 0.5H), 4.25 (br, 0.3H), 4.10 (br, 0.5H), 3.72 (dt,  $J=13.75$ , 3.63, 0.7H), 3.52 (br, 1.0H), 3.47-3.42 (m, 1.0H), 3.41-3.36 (m, 1.5H), 3.30-3.23 (m, 1.5H), 3.20-3.13 (m, 2.4H), 3.06-2.97 (m, 2.6H), 2.87-2.82 (m, 1.0H), 1.72-1.65 (m, 1.0H), 1.60-1.49 (m, 2.3H), 1.42 (br, 0.7H), 1.23 (d,  $J=6.9$ , 2.0H), 1.18 (br, 1.0H), 0.94-0.89 (m, 3.0H), 0.86 (d,  $J=6.55$ , 2.0H), 0.66 (d,  $J=6.55$ , 1.0H). HRMS (APCI)  $C_{31}H_{41}N_5O_4$   $[M+H]^+$  calc'd= 548.3159; found= 548.3493

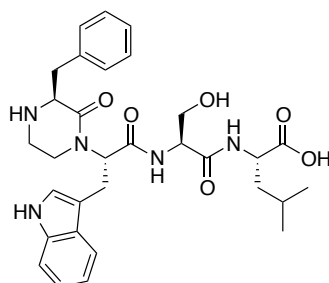

**Monomer peptide 9-FWSL-OH**

<sup>1</sup>H-NMR (400 MHz, d<sub>6</sub>-MeOD) δ 8.08 (q,  $J=7.74$ , 0.6H), 7.58 (d,  $J=7.84$ , 1.0H), 7.30 (d,  $J=8.08$ , 1.0H), 7.26-7.17 (m, 3.0H), 7.12-7.03 (m, 3.4H), 7.01-6.96 (m, 1.0H), 5.36 (dd,  $J=10.5$ , 5.98, 1.0H), 4.48-4.36 (m, 2.0H), 4.12 (dd,  $J=9.75$ , 5.28, 1.0H), 3.81 (d,  $J=4.92$ , 0.3H), 3.79 (d,  $J=4.92$ , 0.7H), 3.77 (d,  $J=6.30$ , 0.3H), 3.74 (d,  $J=6.30$ , 0.7H), 3.52 (dd,  $J=7.20$ , 3.80, 2.0H), 3.44-3.28 (m, 3.0H), 3.14 (dt, 13.04, 3.68, 1.0H), 3.05-2.96 (m, 1.0H), 2.68 (dd,  $J=11.96$ , 9.64, 1.0H), 1.73-1.63 (m, 1.0H), 1.62-1.57 (m, 2.0H), 0.90 (d,  $J=6.50$ , 3.0H), 0.87 (d,  $J=6.50$ , 3.0H). LRMS  $C_{31}H_{39}N_5O_6$   $[M+H]^+$  calc'd= 578.3; found= 578.2

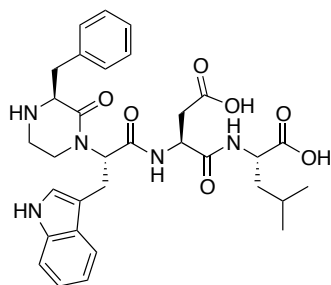

Monomer peptide **10**- FWDL-OH

<sup>1</sup>H-NMR (400 MHz, d<sub>6</sub>-MeOD) δ 8.07 (d, *J* = 8.04, 0.3H), 7.64 (d, *J* = 7.84, 0.7H), 7.38 (d, *J* = 8.04, 1.0H), 7.34-7.25 (m, 3.0H), 7.22-7.11 (m, 4.0H), 7.06 (t, *J* = 7.40, 1.0H), 5.30 (dd, *J* = 9.26, 6.62, 1.0H), 4.49-4.41 (m, 1.0H), 4.14 (dd, *J* = 9.56, 5.36, 1.0H), 3.65-3.54 (m, 1.0H), 3.53-3.36 (m, 4.0H), 3.21 (dt, *J* = 6.24, 3.36, 1.0H), 3.05-2.96 (m, 1.0H), 2.95 (d, *J* = 4.69, 0.4H), 2.91 (d, *J* = 4.6, 0.6H), 2.84-2.74 (m, 2.0H), 1.82-1.73 (m, 1.0H), 1.72-1.63 (m, 2.0H), 0.98 (d, *J* = 6.44, 3.0H), 0.94 (d, *J* = 6.44, 3.0H). LRMS C<sub>32</sub>H<sub>39</sub>N<sub>5</sub>O<sub>7</sub> [M+H]<sup>+</sup> calc'd= 606.3; found= 606.2

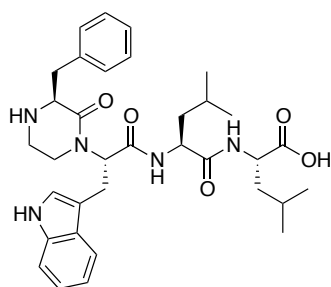

Monomer peptide **11**- FWLL-OH

<sup>1</sup>H-NMR (400 MHz, d<sub>6</sub>-MeOD) δ 8.30 (d, *J* = 7.56, 0.6H), 8.22 (d, *J* = 7.88, 0.5H), 7.68 (d, *J* = 7.88, 0.9H), 7.39 (d, *J* = 8.08, 1.0H), 7.33-7.26 (m, 2.7H), 7.19-7.14 (m, 3.3H), 7.07 (t, *J* = 7.30, 1.0H), 5.50 (dd, *J* = 10.11, 5.37, 1.0H), 4.52-4.43 (m, 2.0H), 4.21 (dd, *J* = 9.54, 5.20, 1.0H), 3.76 (br, 1.0H), 3.63-3.55 (m, 1.0H), 3.49-3.36 (m, 3.0H), 3.22 (dt, *J* = 12.96, 3.80, 1.0H), 3.19-3.11 (m, 1.0H), 2.78 (dd, *J* = 14.92, 9.56, 1.0H), 1.82-1.71 (m, 1.0H), 1.70-1.59 (m, 5.0H), 1.02-0.91 (m, 12.0H). LRMS C<sub>34</sub>H<sub>45</sub>N<sub>5</sub>O<sub>5</sub> [M+H]<sup>+</sup> calc'd= 604.3; found= 604.2

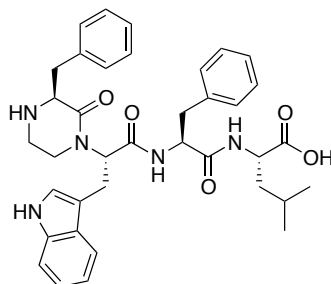

Monomer peptide **12**- FW-F-L-OH

<sup>1</sup>H-NMR (400 MHz, d<sub>6</sub>-MeOD) δ 8.30 (d, *J* = 8.0, 0.4H), 8.13 (d, *J* = 7.92, 0.6H), 7.64 (d, *J* = 7.88, 1.0H), 7.40 (d, *J* = 8.12, 1.0H), 7.35-7.13 (m, 11.0H), 7.08 (t, *J* = 7.42, 1.0H), 5.41 (dd, *J* = 10.08, 6.00, 1.0H), 4.80-4.74 (m, 1.0H), 4.52-4.45 (m, 1.0H), 4.08 (dd, *J* = 9.48, 5.24, 1.0H), 3.56-3.44 (m, 2.0H), 3.43-3.40 (m, 1.0H), 3.39-3.36 (m, 1.0H), 3.29 (d, *J* = 4.84, 1.0H), 3.26 (d, *J* = 4.36, 1.0H), 3.18 (dt, 13.04, 3.56, 1.0H), 2.97-2.87 (m, 2.0H), 2.76 (dd, *J* = 14.86, 9.54, 1.0H),

1.81-1.72 (m, 1.0H), 1.72-1.65 (m, 2.0H), 0.99 (d,  $J = 6.35$ , 3.0H), 0.96 (d,  $J = 6.35$ , 3.0H).  
LRMS  $C_{37}H_{43}N_5O_5$   $[M+H]^+$  calc'd= 638.3; found= 638.2

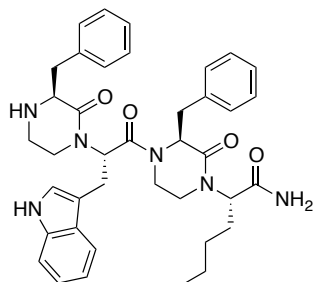

**Oligooxopiperazine 13- FWF(Nle)-NH<sub>2</sub>**

<sup>1</sup>H-NMR (600 MHz, d<sub>6</sub>-DMSO)  $\delta$  10.82 (s, 0.6H), 10.76 (s, 0.4H), 7.56 (d,  $J = 7.58$ , 0.5H), 7.41 (d,  $J = 8.80$ , 1.0H), 7.32 (t,  $J = 8.20$ , 1.0H), 7.29-7.01 (m, 10.0H), 7.08-6.97 (m, 3.0H), 6.53 (br, 1.0H), 5.69 (dd,  $J = 8.55$ , 6.37, 0.6H), 5.19 (br, 0.4H), 4.98 (br, 0.6H), 4.88 (dd,  $J = 10.62$ , 5.46, 0.6H), 4.86 (dd,  $J = 10.62$ , 5.46, 0.4H), 4.72 (dd,  $J = 8.10$ , 4.14, 0.4H), 4.26 (br, 0.4H), 3.97 (t,  $J = 6.69$ , 0.2H), 3.82 (br, 0.6H), 3.29-3.25 (m, 1.0H), 3.22 (d,  $J = 3.96$ , 0.3H), 3.20-3.16 (m, 2.0H), 3.14 (t,  $J = 3.06$ , 0.4H), 3.10 (br, 0.3H), 3.09-3.05 (m, 1.7H), 3.02 (br, 0.5H), 2.98 (dt,  $J = 12.90$ , 3.57, 1.7H), 2.87 (br, 2.0H) 1.80-1.70 (m, 1.4H), 1.63-1.57 (m, 0.6H), 1.56-1.47 (m, 1.0H), 1.32-1.25 (m, 3.0H), 1.23 (s, 2.0H), 1.16-1.10 (m, 1.0H) 1.08-1.02 (m, 0.8H), 1.0-0.93 (m, 0.6H), 0.88 (app q,  $J = 7.38$ , 3.0H). HRMS (ESI)  $C_{39}H_{46}N_6O_4$   $[M+H]^+$  calc'd= 663.3581; found= 663.3908

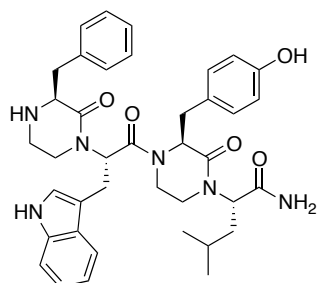

**Oligooxopiperazine 14- FWYL-NH<sub>2</sub>**

<sup>1</sup>H-NMR (600 MHz, d<sub>6</sub>-DMSO)  $\delta$  10.92 (d,  $J = 1.62$ , 0.4H), 10.90 (d,  $J = 1.85$ , 0.6H), 9.27 (br, 3.0H), 7.58 (d,  $J = 7.94$ , 0.6H), 7.47 (d,  $J = 7.48$ , 0.4H), 7.44 (s, 0.4H), 7.41 (s, 0.6H), 7.33-7.23 (m, 4.0H), 7.23-7.16 (m, 2.0), 7.10-6.99 (m, 3.0H), 6.88 (d,  $J = 8.42$ , 1.0H), 6.63-6.60 (m, 2.0H), 6.56 (d,  $J = 8.46$ , 1.0H), 5.67 (dd,  $J = 8.96$ , 6.03, 0.6H), 5.41 (app. t,  $J = 7.77$ , 0.4H), 5.02-4.97 (m, 1.0H), 4.85 (t,  $J = 5.47$ , 0.6H), 4.70 (t,  $J = 6.03$ , 0.4H), 4.30 (br, 0.6H), 4.15 (dt,  $J = 13.27$ , 3.79, 0.4H), 4.09 (br, 0.4H), 3.70 (dt,  $J = 13.27$ , 3.70, 0.6H), 3.63-3.57 (m, 1.0H), 3.33 (br, 1.0H), 3.25-3.07 (m, 6.0H), 3.04-2.85 (m, 3.0H), 2.76-2.67 (m, 1.5H), 2.58 (dd,  $J = 13.85$ , 5.12, 0.5H), 1.62-1.55 (m, 0.4H), 1.55-1.45 (m, 1.6H), 1.33-1.25 (m, 0.5H), 1.24-1.10 (m, 0.5H), 0.88 (d,  $J = 6.55$ , 2.0H), 0.87 (d,  $J = 6.55$ , 2.0H), 0.84 (d,  $J = 6.55$ , 2.0H). HRMS (ESI)  $C_{39}H_{46}N_6O_5$   $[M+H]^+$  calc'd= 679.3530; found= 679.3810

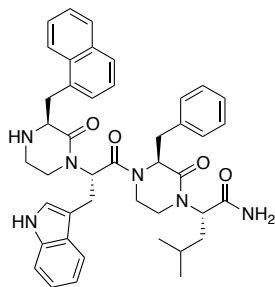

Oligooxopiperazine **15**- (Nap)WFL-NH<sub>2</sub>

<sup>1</sup>H-NMR (600 MHz, d<sub>6</sub>-DMSO) δ 10.92 (br. s, 1.0H), 9.20 (br, 2.0H), 8.03-7.97 (m, 1.3H), 7.90 (br, 0.7H), 7.66-7.53 (m, 2.0H), 7.49-7.38 (m, 2.0H), 7.35 (t, *J* = 7.8, 1.0H), 7.26 (s, 1.0H), 7.15-7.0 (m, 5.0H), 6.99-6.90 (m, 1.5H), 6.52 (s, 0.5H), 5.72 (br, 0.7H), 5.39 (br, 0.3H), 5.01 (dd, *J* = 11.40, 6.00, 1.0H), 4.96 (br, 0.7H), 4.78 (br, 0.3H), 4.33 (br, 0.5H), 4.17 (br, 0.5H), 3.82 (br, 0.3H), 3.76 (br, 1.0H), 3.64 (br, 0.7H), 3.24-3.04 (m, 7.0H), 3.04-2.96 (m, 2.5H), 2.95-2.87 (m, 1.5H), 2.86-2.74 (m, 2.0H), 1.66-1.59 (m, 0.7H), 1.57-1.47 (m, 2.0H), 1.35 (br, 0.3H), 1.24 (br, 0.5H), 1.18 (br, 0.5H), 0.89 (d, *J* = 6.55, 3.5H), 0.85 (d, *J* = 6.55, 2.5H). HRMS (ESI) C<sub>43</sub>H<sub>48</sub>N<sub>6</sub>O<sub>4</sub> [M+H]<sup>+</sup> calc'd = 713.3737; found = 713.4041

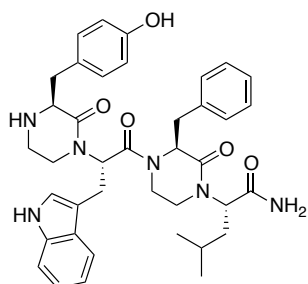

Oligooxopiperazine **16**- YWFL-NH<sub>2</sub>

<sup>1</sup>H-NMR (600 MHz, d<sub>6</sub>-DMSO) δ 10.88 (br, 0.6H), 10.86 (br, 0.4H), 9.37 (br, 1.0H), 9.17 (br, 1.0H), 8.97 (br, 1.0H), 7.57 (d, *J* = 8.00, 0.6H), 7.46-7.39 (m, 1.4H), 7.33 (t, *J* = 7.74, 1.0H), 7.24-7.20 (m, 2.0H), 7.18 (br, 0.5H), 7.12-7.06 (m, 3.5H), 7.05-6.97 (m, 4.0H), 6.89 (br, 1.0H), 6.71 (d, *J* = 7.92, 1.8H), 6.53 (br, 0.2H), 5.67 (dd, *J* = 8.10, 6.30, 0.6H), 5.31 (br, 0.4H), 4.99 (dd, *J* = 10.38, 5.34, 1.0H), 4.93 (t, *J* = 5.82, 0.6H), 4.74 (br, 0.4H), 4.18 (br, 1.0H), 3.99 (br, 0.4H), 3.73 (br, 0.6H), 3.55 (br, 1.0H), 3.25-3.14 (m, 3.5H), 3.13-3.03 (m, 4.0H), 3.00-2.73 (m, 3.0H), 2.79-2.74 (m, 0.5H), 1.65-1.60 (m, 0.5H), 1.56-1.47 (m, 1.5H), 1.33-1.26 (m, 0.5H), 1.22-1.10 (m, 0.5H), 0.89 (d, *J* = 6.55, 2.0H), 0.87 (app. t, *J* = 3.10, 2.0H), 0.84 (d, *J* = 6.55, 2.0H). HRMS (ESI) C<sub>39</sub>H<sub>45</sub>N<sub>5</sub>O<sub>6</sub> [M+H]<sup>+</sup> calc'd = 679.3530; found = 679.3755

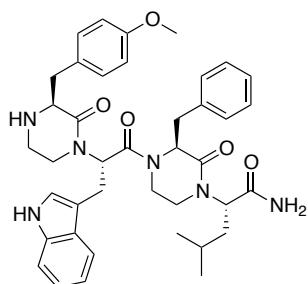

Oligooxopiperazine **17**- Y(O-Me)WFL-NH<sub>2</sub>

<sup>1</sup>H-NMR (600 MHz, d<sub>6</sub>-DMSO) δ 10.89 (br, 0.6H), 10.87 (br, 0.4H), 9.20 (br, 2.0H), 7.57 (d, *J* = 8.00, 0.3H), 7.8-7.39 (m, 1.0H), 7.34 (t, *J* = 8.13, 0.7H), 7.23-7.17 (m, 2.0H), 7.12-7.06 (m, 4.0H), 7.04-6.98 (m, 1.5H), 6.91 (br, 1.0H), 6.90 (d, *J* = 1.5H), 6.54 (br, 1.0H), 5.70 (dd, *J* = 8.79, 6.03, 0.6H), 5.31 (t, *J* = 6.40, 0.4H), 4.99 (dd, *J* = 10.74, 5.52, 1.0H), 4.94 (t, *J* = 5.73, 0.6H), 4.74 (dd, *J* = 7.47, 5.16, 0.4H), 4.24-4.16 (m, 0.4H), 3.73 (app. d, *J* = 2.40, 3.0H), 3.54 (br, 0.6H), 3.28-3.03 (m, 9.0H), 3.02-2.84 (m, 3.0H), 2.83-2.75 (m, 1.0H), 2.68 (br, 1.0H), 1.66-1.60 (m, 0.5H), 1.56-1.45 (m, 2.0H), 1.37-1.31 (m, 0.5H), 1.24-1.12 (m, 1.0H) 0.90-0.86 (m, 4.0H), 0.84 (d, *J* = 6.60, 2.0H). HRMS (ESI) C<sub>40</sub>H<sub>47</sub>N<sub>5</sub>O<sub>6</sub> [M+H]<sup>+</sup> calc'd= 693.3686; found= 693.3944

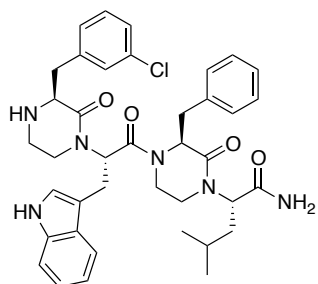

Oligooxopiperazine **18**- F(3-Cl)WFL-NH<sub>2</sub>

<sup>1</sup>H-NMR (600 MHz, d<sub>6</sub>-DMSO) δ 10.88 (s, 0.7H), 10.87 (s, 0.3H), 9.40 (br d, 2.0H), 7.57 (d, *J* = 7.90, 0.6H), 7.48-7.40 (m, 1.4H), 7.38-7.29 (m, 3.5H), 7.25-7.17 (m, 2.5H), 7.16-6.98 (m, 5.0H), 6.95-6.86 (m, 0.8H), 6.54 (br, 0.2H), 5.66 (dd, *J* = 8.77, 6.37, 0.6H), 5.30 (t, *J* = 7.32, 0.4H), 5.02-4.97 (m, 1.0H), 4.94 (t, *J* = 5.85, 0.6H), 4.70 (dd, *J* = 7.83, 5.33, 0.4H), 4.29 (br, 0.6H), 4.19 (dt, *J* = 13.17, 3.76, 0.4H), 4.07 (br, 0.4H), 3.70 (dt, *J* = 13.17, 3.76, 0.6H), 3.62-3.49 (m, 2.0H), 3.30-3.22 (m, 1.0H), 3.23-3.02 (m, 6.0H), 3.16-2.86 (m, 3.0H), 2.76-2.72 (m, 1.0H), 1.66-1.59 (m, 0.4H), 1.56-1.45 (m, 1.6H), 1.36-1.28 (m, 0.5H), 1.26-1.11 (m, 1.5H), 0.89-0.86 (m, 4.0H), 0.84 (d, *J* = 6.57, 2.0H). HRMS (ESI) C<sub>39</sub>H<sub>44</sub>ClN<sub>5</sub>O<sub>5</sub> [M+H]<sup>+</sup> calc'd= 697.3191; found= 697.3568

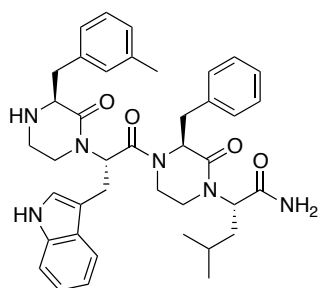

Oligooxopiperazine **19**- F(3-Me)WFL-NH<sub>2</sub>

<sup>1</sup>H-NMR (400 MHz, d<sub>6</sub>-DMSO) δ 10.88 (br, 0.6H), 10.87 (br, 0.4H), 9.18 (br d, 2.0H), 7.57 (d, *J* = 7.65, 0.7H), 7.47-7.39 (m, 1.3H), 7.37-7.32 (m, 1.0H), 7.25-7.18 (m, 3.0H), 7.15-7.07 (m, 3.5H), 7.06-6.97 (m, 3.5H), 6.93-6.88 (m, 1.0H), 5.67 (dd, *J* = 8.82, 6.07, 0.6H), 5.32 (t, *J* = 7.34, 0.4H), 5.02-4.97 (m, 1.0H), 4.93 (t, *J* = 5.68, 0.6H), 4.77-4.71 (dd, *J* = 7.87, 5.65, 0.4H), 4.28 (br, 0.5H), 4.21-4.15 (m, 0.5H), 4.08 (br, 0.5H), 3.75-3.68 (m, 1.5H), 3.39-3.04 (m, 9.0H), 3.02-2.83 (m, 2.5H), 2.79-2.73 (m, 0.5H), 2.29 (s, 3.0H), 1.69-1.59 (m, 0.5H), 1.56-1.47 (m, 2.0H), 1.39-1.27 (m, 0.5H), 1.27-1.06 (m, 2.0H), 0.90-0.86 (m, 4.0H), 0.84 (d, *J* = 6.54, 2.0H). HRMS (ESI) C<sub>40</sub>H<sub>48</sub>N<sub>6</sub>O<sub>4</sub> [M+H]<sup>+</sup> calc'd= 677.3737; found= 677.4042

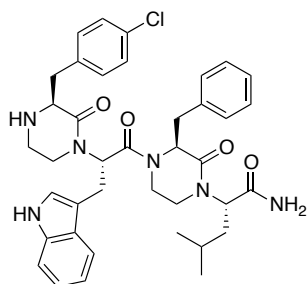

Oligooxopiperazine **20**- F(4-Cl)WFL-NH<sub>2</sub>

<sup>1</sup>H-NMR (600 MHz, d<sub>6</sub>-DMSO) δ 10.88 (s, 0.7H), 10.87 (s, 0.3H), 9.38 (br d, 2.0H), 7.57 (d, *J* = 7.84, 0.5H), 7.45 (s, 0.5H), 7.42 (d, *J* = 8.45, 1.0H), 7.34 (t, *J* = 7.63, 2.5H), 7.24-7.20 (m, 3.0H), 7.16-7.06 (m, 4.0H), 7.05-6.98 (m, 1.5H), 6.90 (br, 0.9H), 6.55 (br, 0.1H), 5.66 (dd, *J* = 8.99, 6.25, 0.6H), 5.30 (t, *J* = 7.32, 0.4H), 5.01-4.97 (m, 1.0H), 4.94 (t, *J* = 5.85, 0.6H), 4.70 (dd, *J* = 8.11, 5.10, 0.4H), 4.25 (br, 0.5H), 4.19 (dt, *J* = 13.52, 3.83, 0.4H), 4.04 (br, 0.5H), 3.72 (dt, *J* = 13.52, 3.83, 0.6H), 3.57 (br, 1.0H), 3.28-3.25 (m, 1.0H), 3.23-3.13 (m, 3.5H), 3.10-3.03 (m, 3.0H), 3.01-2.86 (m, 2.5H), 2.85-2.70 (m, 2.0H), 1.66-1.59 (m, 0.5H), 1.57-1.45 (m, 1.8H), 1.37-1.29 (m, 0.5H), 1.24 (br, 0.2H), 1.21-1.10 (m, 1.0H), 0.90-0.86 (m, 4.0H), 0.84 (d, *J* = 6.56, 2.0H). HRMS (APCI) C<sub>39</sub>H<sub>44</sub>ClN<sub>5</sub>O<sub>5</sub> [M+H]<sup>+</sup> calc'd= 697.3191; found= 697.3587

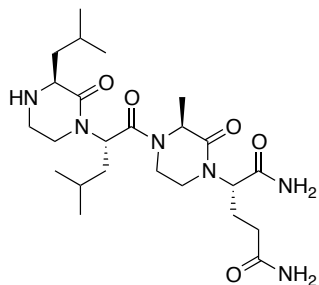

Oligooxopiperazine **21**- LLAQ

$^1\text{H-NMR}$  (600 MHz,  $d_6$ -DMSO, 100 °C)  $\delta$  6.87 (br, 3H), 6.61 (br, 3H), 5.36 (t,  $J = 7.47$ , 1H), 4.90-4.85 (m, 1H), 4.67 (q,  $J = 6.88$ , 1H), 3.96 (br, 2H), 3.63-3.24 (m, 8H), 1.95-1.82 (m, 3H), 1.72-1.58 (m, 3H), 1.57-1.49 (m, 1H), 1.38 (s, 3H), 1.06-0.75 (m, 12H). HRMS (ESI)  $\text{C}_{24}\text{H}_{42}\text{N}_6\text{O}_5$   $[\text{M}+\text{H}]^+$  calc'd= 494.3217; found= 495.3502

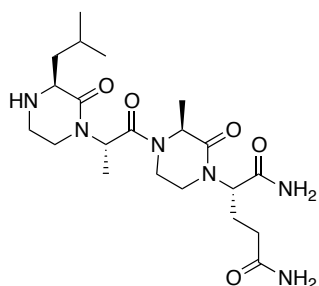

Oligooxopiperazine **22**- LAAQ

$^1\text{H-NMR}$  (400 MHz,  $d_6$ -DMSO, 100 °C)  $\delta$  6.77 (br, 2H), 6.52 (br, 2H), 5.34 (q,  $J = 6.91$ , 1H), 4.90-4.84 (m, 1H), 4.67 (q,  $J = 6.91$ , 1H), 4.01-3.91 (m, 1H), 3.76-3.69 (m, 1H), 3.57-3.27 (m, 7H), 3.24-3.14 (m, 1H), 2.19-2.01 (m, 3H), 2.00-1.80 (m, 3H), 1.64-1.55 (m, 1H), 1.38 (d,  $J = 6.92$ , 3H), 1.27 (d,  $J = 6.92$ , 3H), 0.94 (t,  $J = 6.02$ , 6H). HRMS (ESI)  $\text{C}_{21}\text{H}_{36}\text{N}_6\text{O}_5$   $[\text{M}+\text{H}]^+$  calc'd= 453.2747; found= 453.2863

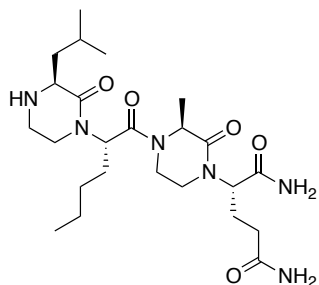

Oligooxopiperazine **23**- L(Nle)AQ

$^1\text{H-NMR}$  (600 MHz,  $d_6$ -DMSO, 100 °C)  $\delta$  6.87 (br, 4H), 5.27 (t,  $J = 7.25$ , 1H), 4.92-4.83 (m, 1H), 4.67 (q,  $J = 7.07$ , 1H), 3.96 (br, 1H), 3.88 (br, 1H), 3.59-3.56 (m, 1H), 3.54-3.46 (m, 3H), 3.45-3.39 (m, 2H), 3.36-3.31 (m, 1H), 3.30-3.21 (m, 1H), 2.12-2.01 (m, 2H), 1.99-1.83 (m, 2H), 1.80-1.59 (m, 4H), 1.39-1.20 (m, 8H), 0.95 (d,  $J = 6.29$ , 3H), 0.94 (d,  $J = 6.19$ , 3H), 0.89 (t,  $J = 7.31$ , 3H). HRMS (ESI)  $\text{C}_{24}\text{H}_{42}\text{N}_6\text{O}_5$   $[\text{M}+\text{H}]^+$  calc'd= 495.3217; found= 495.3377



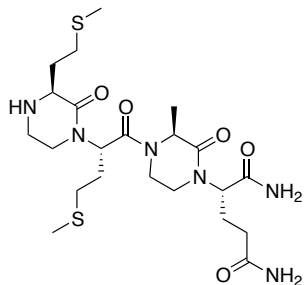

Oligooxopiperazine **24**- MMAQ

$^1\text{H-NMR}$  (600 MHz,  $d_6$ -DMSO, 100 °C)  $\delta$  9.33 (br, 1H), 6.90 (br, 3H), 5.46 (t,  $J = 6.91$ , 1H), 4.91-4.84 (m, 1H), 4.70-4.63 (m, 1H), 4.16-3.91 (m, 1H), 3.87-3.75 (m, 1H), 3.59-3.54 (m, 2H), 3.50 (t,  $J = 5.98$ , 2H), 3.47-3.40 (m, 1H), 3.36-3.22 (m, 3H), 2.70-2.60 (m, 3H), 2.23-2.14 (m, 1H), 2.08 (d,  $J = 2.96$ , 3H), 2.07-1.87 (m, 5H), 1.74-1.62 (m, 5H), 1.7 (br, 1H), 1.27 (s, 3H). HRMS (ESI)  $\text{C}_{22}\text{H}_{38}\text{N}_6\text{O}_5\text{S}_2$   $[\text{M}+\text{H}]^+$  calc'd= 530.2345; found= 531.2423.

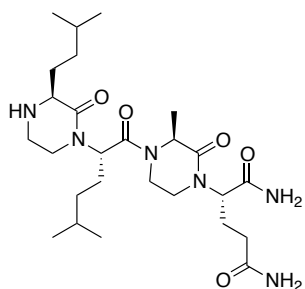

Oligooxopiperazine **25**- (Hle)(Hle)AQ

$^1\text{H-NMR}$  (600 MHz,  $d_6$ -DMSO, 100 °C)  $\delta$  6.83 (br, 4H), 5.26 (t,  $J = 7.06$ , 1H), 4.92-4.83 (m, 1H), 4.66 (q,  $J = 6.80$ , 1H), 3.96 (br, 1H), 3.88 (br, 1H), 3.55-3.46 (m, 3H), 3.45-3.36 (m, 3H), 3.35-3.30 (m, 1H), 3.29-3.22 (m, 1H), 3.21 (s, 1H), 1.99-1.83 (m, 2H), 1.83-1.63 (m, 3H), 1.62-1.49 (m, 2H), 1.46-1.20 (m, 7H), 1.19-1.09 (m, 2H), 0.95-0.83 (m, 12H). HRMS (ESI)  $\text{C}_{24}\text{H}_{42}\text{N}_6\text{O}_5$   $[\text{M}+\text{H}]^+$  calc'd= 523.3530; found= 523.3642

## References:

- (1) Uhrinova, S.; Uhrin, D.; Powers, H.; Watt, K.; Zheleva, D.; Fischer, P.; McInnes, C.; Barlow, P. N. *J. Mol. Biol.* **2005**, *350*, 587.
- (2) Stoll, R.; Renner, C.; Muhlhahn, P.; Hansen, S.; Schumacher, R.; Hesse, F.; Kaluza, B.; Engh, R. A.; Voelter, W.; Holak, T. A. *J. Biomolec. NMR* **2000**, *17*, 91.
- (3) Williamson, M. P. *Prog. Nucl. Magn. Reson. Spectrosc.* **2013**, *73*, 1.
- (4) Coin, I.; Beyermann, M.; Bienert, M. *Nat. Protoc.* **2007**, *2*, 3247.
- (5) Roehrl, M. H.; Wang, J. Y.; Wagner, G. *Biochemistry* **2004**, *43*, 16056.
